# Supplementary material for: A {Cu6}-added polyoxometalate cluster–organic framework: synthesis, structure and application as a solid support for enzyme immobilization
Source: Royal Society of Chemistry journal article supplement (doi:10.1039/d3dt00822c), 2023-01-01
Supplement: d3dt00822c1.pdf [file d3dt00822c1.pdf]

## Supporting Information

### **A {Cu<sub>6</sub>}-Added Polyoxometalate Cluster-organic Framework: Synthesis, Structure and Application as a Solid Support for Enzyme Immobilization**

Zhao-Min Su,<sup>†a</sup> Yongchun Wang,<sup>†a</sup> Zhikun Xu,<sup>b</sup> Wenhui Shang,<sup>a</sup> Zhiyu Jia,<sup>\*a</sup> and  
Guo-Yu Yang<sup>\*a</sup>

<sup>a</sup> MOE Key Laboratory of Cluster Science, School of Chemistry and Chemical Engineering, Beijing Institute of Technology, Beijing 100081, China.

<sup>b</sup> College of Veterinary Medicine, Henan University of Animal Husbandry and Economy, Longzihu North road No 6, Zhengzhou, 450046, Henan, P. R. China.

<sup>†</sup> These authors contributed equally to this work.

E-Mail: [jzy@bit.edu.cn](mailto:jzy@bit.edu.cn), [ygy@bit.edu.cn](mailto:ygy@bit.edu.cn)

## EXPERIMENTAL SECTION

### Materials and Methods

The starting materials  $\text{Na}_9[\text{A-}\alpha\text{-PW}_9\text{O}_{34}]\cdot 7\text{H}_2\text{O}$  was prepared according to the literatures. All other chemicals employed in this study were analytical reagent without further purification. Elemental analyses of C and H were carried out with a Flash EA1112 elemental analyzer. IR spectra (KBr pellets) were recorded on a Smart Omni-Transmission spectrometer over a range of 400-4000  $\text{cm}^{-1}$ . TGA were performed on a Mettler Toledo TGA/DSC 1000 analyzer at air atmosphere with a heating rate of 10  $^{\circ}\text{C}/\text{min}$ . These data can be obtained free of charge from Powder XRD patterns were obtained using a Bruker D8 Advance XRD diffractometer with Cu  $\text{K}\alpha$  radiation ( $\lambda = 1.54056 \text{ \AA}$ ). UV/Vis-NIR diffuse reflectance spectra were recorded on a UV 3600 spectrophotometer (Shimadzu, Japan).

### Synthesis of $\{\text{Cu}_{0.5}\text{Na}_{0.25}\text{Cl}_{0.25}(\text{dap})_{0.5}(\text{H}_2\text{O})_{1.5}[\text{Cu}_6(\mu\text{-OH})_3(\text{H}_2\text{O})_4(\text{dap})_{2.16}(\text{B-}\alpha\text{-PW}_9\text{O}_{34})](1,4\text{-NDC})_{1/2}\}$ (1):

A sample of  $\text{Na}_9[\text{A-}\alpha\text{-PW}_9\text{O}_{34}]\cdot 7\text{H}_2\text{O}$  (0.49 g), HAc (0.2mL),  $\text{CuCl}_2\cdot 2\text{H}_2\text{O}$  (0.34g) was stirred in distilled water (10 mL) for 5 min, forming a blue clear solution. Then, dap (0.1 mL) was added dropwise with continuous stirring. To this solution, 1,4- $\text{H}_2\text{NDC}$  (0.20 g) was added and the pH was adjusted to 4.6 with 2 M NaOH. The resulting solution was stirred for 120 min and sealed in a 35 mL stainless steel reactor with a Teflon liner and heated at 80 $^{\circ}\text{C}$  for 5 days, and then cooled to room

temperature, upon which green crystals were obtained. Yields: 36% (220 mg) based on  $\text{Na}_9[\text{A}-\alpha\text{-PW}_9\text{O}_{34}] \cdot 7\text{H}_2\text{O}$ .

**Table S1.** Crystallographic data and structure refinements for **1**.

| <b>Cu-POMCOF</b>                                  |                                                                                                                |
|---------------------------------------------------|----------------------------------------------------------------------------------------------------------------|
| formula                                           | $\text{Na}_{0.4}\text{C}_{16.50}\text{H}_{55}\text{Cl}_{0.6}\text{Cu}_{6.6}\text{N}_7\text{PO}_{46}\text{W}_9$ |
| Formula weight                                    | 3205.42                                                                                                        |
| Crystal color                                     | blue                                                                                                           |
| crystal system                                    | monoclinic                                                                                                     |
| space group                                       | $\text{P2}_1/\text{c}$                                                                                         |
| Temperature                                       | 173(2) K                                                                                                       |
| Wavelength                                        | 0.71073 Å                                                                                                      |
| $a/\text{Å}$                                      | 10.9919(11)                                                                                                    |
| $b/\text{Å}$                                      | 20.479(2)                                                                                                      |
| $c/\text{Å}$                                      | 27.193(3)                                                                                                      |
| $\alpha/^\circ$                                   | 90                                                                                                             |
| $\beta/^\circ$                                    | 91.529(3)                                                                                                      |
| $\gamma/^\circ$                                   | 90                                                                                                             |
| $V/\text{Å}^3$                                    | 6119.2(11)                                                                                                     |
| Z                                                 | 4                                                                                                              |
| $D_c/\text{g cm}^{-3}$                            | 3.479                                                                                                          |
| $\mu/\text{mm}^{-1}$                              | 19.188                                                                                                         |
| $F_{000}$                                         | 5800                                                                                                           |
| Crystal size                                      | 0.250 x 0.220 x 0.180 mm <sup>3</sup>                                                                          |
| $\theta$ range/ $^\circ$                          | 1.798 to 30.000                                                                                                |
| Reflections collected                             | 82582                                                                                                          |
| Independent reflections                           | 17725                                                                                                          |
| $R(\text{int})$                                   | 0.0424                                                                                                         |
| Completeness                                      | 1.000                                                                                                          |
| Data/restraints/parameters                        | 17725/152/926                                                                                                  |
| Goodness-of-fit on $F^2$                          | 1.067                                                                                                          |
| Final $R$ indices<br>[ $I > 2\sigma(I)$ ]         | $R_1 = 0.0322$ , $wR_2 = 0.0617$                                                                               |
| $R$ indices (all data)                            | $R_1 = 0.0442$ , $wR_2 = 0.0651$                                                                               |
| Largest diff. peak and<br>hole/ $\text{e.Å}^{-3}$ | 2.623/-2.752                                                                                                   |

In asymmetric unit of this data, there were two disordered water molecules which

could not be restrained properly. Therefore, SQUEEZE algorithm was used to omit them. The moiety including Cu7 was strongly disordered and we have to divide it into three parts (50% Cu<sup>2+</sup> and 25% Na<sup>+</sup>). 19 ISOR, 1 SIMU and 20 DFIX instructions were used to restrain disordered moiety, naphthalenedicarboxylate ligand and hydroxide anions so that there were 152 restraints in the data. Hydrogen of water molecules could not be found and others were put in calculated positions.

**Table S2.** Elemental analysis for Cu-POMCOF.

| Elemental analysis   |   | calcd (%) | Found (%) |
|----------------------|---|-----------|-----------|
| Compound<br><b>1</b> | C | 6.77      | 7.28      |
|                      | N | 3.51      | 2.89      |
|                      | H | 1.25      | 1.74      |

**Table S3.** Atomic coordinates ( $\times 10^4$ ) and equivalent isotropic displacement parameters ( $\text{\AA}^2 \times 10^3$ ) for platon\_sq.  $U(\text{eq})$  is defined as one third of the trace of the orthogonalized  $U_{ij}$  tensor.

|       | x       | y       | z       | $U(\text{eq})$ |
|-------|---------|---------|---------|----------------|
| P(1)  | 3496(1) | 6512(1) | 7130(1) | 9(1)           |
| W(1)  | 1033(1) | 7534(1) | 7523(1) | 18(1)          |
| W(2)  | 3124(1) | 8107(1) | 6554(1) | 19(1)          |
| W(3)  | 925(1)  | 6762(1) | 6293(1) | 23(1)          |
| W(4)  | 3504(1) | 7272(1) | 8305(1) | 14(1)          |
| W(5)  | 5592(1) | 7795(1) | 7331(1) | 13(1)          |
| W(6)  | 5488(1) | 7099(1) | 6208(1) | 18(1)          |
| W(7)  | 3274(1) | 5762(1) | 5939(1) | 20(1)          |
| W(8)  | 1386(1) | 5242(1) | 6824(1) | 20(1)          |
| W(9)  | 1547(1) | 6028(1) | 8059(1) | 18(1)          |
| Cu(1) | 4673(1) | 5641(1) | 8020(1) | 12(1)          |
| Cu(2) | 4553(1) | 4951(1) | 6973(1) | 13(1)          |
| Cu(3) | 6456(1) | 6134(1) | 7223(1) | 11(1)          |
| Cu(4) | 6499(1) | 6648(1) | 8344(1) | 17(1)          |
| Cu(5) | 2985(1) | 4427(1) | 7767(1) | 18(1)          |
| Cu(6) | 6289(1) | 5379(1) | 6225(1) | 19(1)          |
| O(1)  | 2077(4) | 8021(2) | 7105(2) | 20(1)          |
| O(2)  | 2006(4) | 7474(2) | 6264(2) | 24(1)          |
| O(3)  | 546(4)  | 7083(2) | 6931(2) | 22(1)          |
| O(4)  | -156(4) | 8057(2) | 7606(2) | 32(1)          |
| O(5)  | 2622(5) | 8826(2) | 6291(2) | 33(1)          |
| O(6)  | -295(5) | 7015(3) | 5946(2) | 37(1)          |
| O(7)  | 2070(4) | 7789(2) | 8056(2) | 19(1)          |
| O(8)  | 4365(4) | 8391(2) | 6984(2) | 18(1)          |
| O(9)  | 4260(5) | 7815(2) | 6098(2) | 24(1)          |
| O(10) | 1866(5) | 6327(2) | 5812(2) | 26(1)          |
| O(11) | 392(4)  | 5925(2) | 6507(2) | 24(1)          |
| O(12) | 531(4)  | 6796(2) | 7876(2) | 22(1)          |
| O(13) | 4437(4) | 7790(2) | 7845(2) | 15(1)          |

|       |          |          |           |       |
|-------|----------|----------|-----------|-------|
| O(14) | 6158(4)  | 7718(2)  | 6667(2)   | 18(1) |
| O(15) | 4257(4)  | 6531(2)  | 5933(2)   | 21(1) |
| O(16) | 2098(4)  | 5165(2)  | 6195(2)   | 22(1) |
| O(17) | 1022(4)  | 5653(2)  | 7441(2)   | 19(1) |
| O(18) | 2321(4)  | 6660(2)  | 8508(2)   | 19(1) |
| O(19) | 3788(5)  | 7693(2)  | 8840(2)   | 25(1) |
| O(20) | 6595(4)  | 8376(2)  | 7557(2)   | 20(1) |
| O(21) | 6358(5)  | 7216(2)  | 5700(2)   | 30(1) |
| O(22) | 3484(5)  | 5473(3)  | 5355(2)   | 31(1) |
| O(23) | 334(5)   | 4619(2)  | 6816(2)   | 35(1) |
| O(24) | 568(5)   | 5630(2)  | 8447(2)   | 32(1) |
| O(25) | 4699(4)  | 6670(2)  | 8298(2)   | 17(1) |
| O(26) | 6306(4)  | 7040(2)  | 7496(2)   | 14(1) |
| O(27) | 6232(4)  | 6438(2)  | 6537(2)   | 17(1) |
| O(28) | 4473(4)  | 5337(2)  | 6311(2)   | 15(1) |
| O(29) | 2761(4)  | 4861(2)  | 7099(2)   | 16(1) |
| O(30) | 2903(4)  | 5537(2)  | 8081(2)   | 15(1) |
| O(31) | 2712(4)  | 6755(2)  | 7557(2)   | 13(1) |
| O(32) | 4139(4)  | 7113(2)  | 6907(2)   | 13(1) |
| O(33) | 2652(4)  | 6207(2)  | 6731(2)   | 16(1) |
| O(34) | 4400(4)  | 6013(2)  | 7321(2)   | 12(1) |
| O(35) | 6390(4)  | 5853(2)  | 7915(2)   | 15(1) |
| O(36) | 4664(4)  | 4668(2)  | 7649(2)   | 15(1) |
| O(37) | 6301(4)  | 5235(2)  | 6939(2)   | 14(1) |
| O(38) | 4926(5)  | 5277(2)  | 8684(2)   | 26(1) |
| O(39) | 6269(6)  | 5986(3)  | 9019(2)   | 44(2) |
| O(40) | 4945(7)  | 3968(3)  | 6620(2)   | 46(2) |
| O(41) | 8510(5)  | 6192(3)  | 7244(2)   | 41(2) |
| C(1)  | 6059(19) | 5094(14) | 9860(10)  | 32(4) |
| C(2)  | 5118(16) | 5298(12) | 9539(7)   | 26(3) |
| C(3)  | 3885(17) | 5268(17) | 9695(11)  | 35(4) |
| C(4)  | 2912(12) | 5512(8)  | 9397(5)   | 30(3) |
| C(5)  | 1742(14) | 5487(9)  | 9569(6)   | 39(4) |
| C(1') | 3632(17) | 5027(14) | 10177(10) | 32(4) |
| C(2') | 4600(18) | 4792(12) | 10474(8)  | 26(3) |
| C(3') | 5810(20) | 4837(16) | 10320(12) | 35(4) |
| C(4') | 2420(14) | 5005(9)  | 10333(6)  | 42(4) |
| C(5') | 1483(17) | 5268(12) | 10038(7)  | 56(6) |

|        |          |          |           |         |
|--------|----------|----------|-----------|---------|
| C(6)   | 5518(8)  | 5526(4)  | 9040(3)   | 31(2)   |
| N(1)   | 6645(6)  | 7530(3)  | 8660(3)   | 36(2)   |
| N(2)   | 8298(5)  | 6620(4)  | 8418(2)   | 32(2)   |
| C(7)   | 8216(15) | 8377(8)  | 8889(8)   | 131(8)  |
| C(8)   | 7962(10) | 7745(6)  | 8622(6)   | 79(4)   |
| C(9)   | 8716(9)  | 7168(6)  | 8724(5)   | 73(4)   |
| N(3)   | 3263(7)  | 4146(3)  | 8469(2)   | 34(2)   |
| N(4)   | 1266(6)  | 4185(3)  | 7875(3)   | 36(2)   |
| C(10)  | 1973(13) | 3730(7)  | 9164(5)   | 43(3)   |
| C(11)  | 2070(11) | 4108(4)  | 8701(4)   | 59(3)   |
| C(12)  | 1224(10) | 3800(4)  | 8342(4)   | 58(3)   |
| N(3')  | 1266(6)  | 4185(3)  | 7875(3)   | 36(2)   |
| N(4')  | 3263(7)  | 4146(3)  | 8469(2)   | 34(2)   |
| C(10') | 180(19)  | 3753(13) | 8680(9)   | 42(6)   |
| C(11') | 1224(10) | 3800(4)  | 8342(4)   | 58(3)   |
| C(12') | 2070(11) | 4108(4)  | 8701(4)   | 59(3)   |
| N(5)   | 8062(6)  | 5228(4)  | 6164(3)   | 45(2)   |
| N(6)   | 6305(7)  | 5569(4)  | 5511(2)   | 38(2)   |
| C(13)  | 9582(17) | 5132(17) | 5447(9)   | 95(10)  |
| C(14)  | 8360(10) | 5230(8)  | 5635(5)   | 80(4)   |
| C(15)  | 7567(11) | 5715(6)  | 5389(5)   | 77(4)   |
| N(5')  | 6305(7)  | 5569(4)  | 5511(2)   | 38(2)   |
| N(6')  | 8062(6)  | 5228(4)  | 6164(3)   | 45(2)   |
| C(13') | 7950(30) | 5970(13) | 4913(7)   | 82(8)   |
| C(14') | 7567(11) | 5715(6)  | 5389(5)   | 77(4)   |
| C(15') | 8360(10) | 5230(8)  | 5635(5)   | 80(4)   |
| C(16)  | 1230(30) | 6731(14) | 10057(16) | 168(13) |
| C(17)  | 2050(20) | 7329(12) | 10065(11) | 107(6)  |
| C(18)  | 1350(20) | 7856(11) | 9786(11)  | 97(7)   |
| N(7)   | 3260(20) | 7150(13) | 9936(10)  | 112(7)  |
| N(8)   | 2294(17) | 8340(9)  | 9701(7)   | 61(5)   |
| Cl(1A) | 4849(9)  | 8883(4)  | 9505(2)   | 15(3)   |
| O(42A) | 4849(9)  | 8883(4)  | 9505(2)   | 15(3)   |
| Cu(7)  | 3936(3)  | 7927(2)  | 9637(1)   | 38(1)   |
| O(43)  | 5990(40) | 7100(20) | 9719(16)  | 87(12)  |
| Cu(7') | 3666(9)  | 8399(5)  | 9554(3)   | 36(2)   |
| O(42)  | 3750(20) | 9153(9)  | 9143(9)   | 34(5)   |
| O(43A) | 5470(20) | 7459(12) | 9750(7)   | 66(6)   |

|        |          |          |          |        |
|--------|----------|----------|----------|--------|
| Cl(1)  | 5426(16) | 8715(6)  | 9510(4)  | 34(4)  |
| Na(1)  | 4514(14) | 7735(7)  | 9715(5)  | 37(3)  |
| O(43B) | 6630(30) | 6950(20) | 9707(11) | 82(11) |
| O(47)  | 2240(16) | 7991(9)  | 9520(6)  | 69(5)  |
| O(44)  | 8190(6)  | 46(3)    | 3208(3)  | 56(2)  |
| O(45)  | 2134(7)  | 5713(3)  | 2708(3)  | 66(2)  |
| O(46)  | 1322(8)  | 8704(4)  | 8752(4)  | 82(3)  |

---



**Table S4.** Bond lengths [ $\text{\AA}$ ] and angles [ $^\circ$ ] for platon\_sq.

---

|            |          |
|------------|----------|
| P(1)-O(34) | 1.509(4) |
| P(1)-O(33) | 1.541(4) |
| P(1)-O(31) | 1.546(4) |
| P(1)-O(32) | 1.551(4) |
| W(1)-O(4)  | 1.709(5) |
| W(1)-O(12) | 1.880(5) |
| W(1)-O(7)  | 1.893(5) |
| W(1)-O(1)  | 1.916(5) |
| W(1)-O(3)  | 1.920(5) |
| W(1)-O(31) | 2.438(4) |
| W(2)-O(5)  | 1.722(5) |
| W(2)-O(8)  | 1.865(5) |
| W(2)-O(9)  | 1.881(5) |
| W(2)-O(1)  | 1.920(5) |
| W(2)-O(2)  | 1.940(5) |
| W(2)-O(32) | 2.500(4) |
| W(3)-O(6)  | 1.702(5) |
| W(3)-O(2)  | 1.884(5) |
| W(3)-O(11) | 1.906(5) |
| W(3)-O(10) | 1.910(5) |
| W(3)-O(3)  | 1.911(5) |
| W(3)-O(33) | 2.488(4) |
| W(4)-O(19) | 1.714(5) |
| W(4)-O(25) | 1.802(4) |
| W(4)-O(18) | 1.898(4) |
| W(4)-O(13) | 1.951(4) |
| W(4)-O(7)  | 2.002(4) |
| W(4)-O(31) | 2.433(4) |
| W(5)-O(20) | 1.724(4) |
| W(5)-O(26) | 1.786(4) |
| W(5)-O(13) | 1.913(4) |
| W(5)-O(14) | 1.933(4) |
| W(5)-O(8)  | 2.034(4) |
| W(5)-O(32) | 2.393(4) |
| W(6)-O(21) | 1.717(5) |
| W(6)-O(27) | 1.808(4) |

|             |            |
|-------------|------------|
| W(6)-O(14)  | 1.912(4)   |
| W(6)-O(15)  | 1.921(5)   |
| W(6)-O(9)   | 2.009(5)   |
| W(6)-O(32)  | 2.443(4)   |
| W(7)-O(22)  | 1.716(5)   |
| W(7)-O(28)  | 1.856(4)   |
| W(7)-O(15)  | 1.910(5)   |
| W(7)-O(16)  | 1.922(5)   |
| W(7)-O(10)  | 1.956(5)   |
| W(7)-O(33)  | 2.452(5)   |
| W(8)-O(23)  | 1.721(5)   |
| W(8)-O(29)  | 1.840(4)   |
| W(8)-O(16)  | 1.908(5)   |
| W(8)-O(17)  | 1.928(5)   |
| W(8)-O(11)  | 1.962(4)   |
| W(8)-O(33)  | 2.435(4)   |
| W(9)-O(24)  | 1.731(5)   |
| W(9)-O(30)  | 1.797(4)   |
| W(9)-O(17)  | 1.921(5)   |
| W(9)-O(18)  | 1.960(5)   |
| W(9)-O(12)  | 1.984(4)   |
| W(9)-O(31)  | 2.411(4)   |
| Cu(1)-O(35) | 1.964(4)   |
| Cu(1)-O(38) | 1.967(5)   |
| Cu(1)-O(30) | 1.969(4)   |
| Cu(1)-O(34) | 2.061(4)   |
| Cu(1)-O(36) | 2.234(4)   |
| Cu(1)-O(25) | 2.239(4)   |
| Cu(1)-Cu(4) | 2.9925(11) |
| Cu(2)-O(36) | 1.930(4)   |
| Cu(2)-O(28) | 1.965(4)   |
| Cu(2)-O(37) | 2.012(4)   |
| Cu(2)-O(29) | 2.016(4)   |
| Cu(2)-O(40) | 2.274(6)   |
| Cu(2)-O(34) | 2.380(4)   |
| Cu(2)-Cu(6) | 2.9579(11) |
| Cu(2)-Cu(5) | 2.9981(11) |
| Cu(3)-O(35) | 1.971(4)   |

|               |           |
|---------------|-----------|
| Cu(3)-O(27)   | 1.975(4)  |
| Cu(3)-O(37)   | 2.003(4)  |
| Cu(3)-O(26)   | 2.005(4)  |
| Cu(3)-O(41)   | 2.260(5)  |
| Cu(3)-O(34)   | 2.296(4)  |
| Cu(4)-O(25)   | 1.979(4)  |
| Cu(4)-N(2)    | 1.983(6)  |
| Cu(4)-O(35)   | 2.005(4)  |
| Cu(4)-N(1)    | 2.006(6)  |
| Cu(4)-O(39)   | 2.301(6)  |
| Cu(5)-O(36)   | 1.946(4)  |
| Cu(5)-N(3')   | 1.982(6)  |
| Cu(5)-N(4)    | 1.982(6)  |
| Cu(5)-N(4')   | 2.008(6)  |
| Cu(5)-N(3)    | 2.008(6)  |
| Cu(5)-O(29)   | 2.033(5)  |
| Cu(5)-O(20)#1 | 2.375(4)  |
| Cu(5)-O(30)   | 2.432(4)  |
| Cu(6)-O(37)   | 1.963(4)  |
| Cu(6)-N(5')   | 1.980(7)  |
| Cu(6)-N(6)    | 1.980(7)  |
| Cu(6)-N(6')   | 1.985(7)  |
| Cu(6)-N(5)    | 1.985(7)  |
| Cu(6)-O(28)   | 2.018(4)  |
| Cu(6)-O(27)   | 2.330(4)  |
| O(19)-Cu(7)   | 2.222(6)  |
| O(19)-Cu(7')  | 2.426(11) |
| O(19)-Na(1)   | 2.492(16) |
| O(35)-H(35)   | 0.840(6)  |
| O(36)-H(36)   | 0.840(6)  |
| O(37)-H(37)   | 0.840(6)  |
| O(38)-C(6)    | 1.261(9)  |
| O(39)-C(6)    | 1.254(10) |
| C(1)-C(3')    | 1.39(4)   |
| C(1)-C(2)     | 1.399(18) |
| C(1)-H(1)     | 0.9500    |
| C(2)-C(3)     | 1.432(18) |
| C(2)-C(6)     | 1.513(16) |

|              |           |
|--------------|-----------|
| C(3)-C(4)    | 1.415(17) |
| C(3)-C(1')   | 1.43(4)   |
| C(4)-C(5)    | 1.381(15) |
| C(4)-H(4)    | 0.9500    |
| C(5)-C(5')   | 1.39(2)   |
| C(5)-H(5)    | 0.9500    |
| C(1')-C(2')  | 1.40(3)   |
| C(1')-C(4')  | 1.409(17) |
| C(2')-C(3')  | 1.40(3)   |
| C(3')-H(3')  | 0.9500    |
| C(4')-C(5')  | 1.396(16) |
| C(4')-H(4')  | 0.9500    |
| C(5')-H(5')  | 0.9500    |
| N(1)-C(8)    | 1.519(13) |
| N(1)-H(1A)   | 0.9100    |
| N(1)-H(1B)   | 0.9100    |
| N(2)-C(9)    | 1.464(11) |
| N(2)-H(2A)   | 0.9100    |
| N(2)-H(2B)   | 0.9100    |
| C(7)-C(8)    | 1.506(16) |
| C(7)-H(7A)   | 0.9800    |
| C(7)-H(7B)   | 0.9800    |
| C(7)-H(7C)   | 0.9800    |
| C(8)-C(9)    | 1.466(16) |
| C(8)-H(8)    | 1.0000    |
| C(9)-H(9A)   | 0.9900    |
| C(9)-H(9B)   | 0.9900    |
| N(3)-C(11)   | 1.472(12) |
| N(3)-H(3A)   | 0.9100    |
| N(3)-H(3B)   | 0.9100    |
| N(4)-C(12)   | 1.497(12) |
| N(4)-H(4A)   | 0.9100    |
| N(4)-H(4B)   | 0.9100    |
| C(10)-C(11)  | 1.485(15) |
| C(10)-H(10A) | 0.9800    |
| C(10)-H(10B) | 0.9800    |
| C(10)-H(10C) | 0.9800    |
| C(11)-C(12)  | 1.473(16) |

|               |           |
|---------------|-----------|
| C(11)-H(11)   | 1.0000    |
| C(12)-H(12A)  | 0.9900    |
| C(12)-H(12B)  | 0.9900    |
| N(3')-C(11')  | 1.497(12) |
| N(3')-H(3'A)  | 0.9100    |
| N(3')-H(3'B)  | 0.9100    |
| N(4')-C(12')  | 1.472(12) |
| N(4')-H(4'A)  | 0.9100    |
| N(4')-H(4'B)  | 0.9100    |
| C(10')-C(11') | 1.493(16) |
| C(10')-H(10D) | 0.9800    |
| C(10')-H(10E) | 0.9800    |
| C(10')-H(10F) | 0.9800    |
| C(11')-C(12') | 1.473(16) |
| C(11')-H(11') | 1.0000    |
| C(12')-H(12C) | 0.9900    |
| C(12')-H(12D) | 0.9900    |
| N(5)-C(14)    | 1.484(14) |
| N(5)-H(5A)    | 0.9100    |
| N(5)-H(5B)    | 0.9100    |
| N(6)-C(15)    | 1.466(13) |
| N(6)-H(6A)    | 0.9100    |
| N(6)-H(6B)    | 0.9100    |
| C(13)-C(14)   | 1.464(16) |
| C(13)-H(13A)  | 0.9800    |
| C(13)-H(13B)  | 0.9800    |
| C(13)-H(13C)  | 0.9800    |
| C(14)-C(15)   | 1.470(17) |
| C(14)-H(14)   | 1.0000    |
| C(15)-H(15A)  | 0.9900    |
| C(15)-H(15B)  | 0.9900    |
| N(5')-C(14')  | 1.466(13) |
| N(5')-H(5'A)  | 0.9100    |
| N(5')-H(5'B)  | 0.9100    |
| N(6')-C(15')  | 1.484(14) |
| N(6')-H(6'A)  | 0.9100    |
| N(6')-H(6'B)  | 0.9100    |
| C(13')-C(14') | 1.469(15) |

|                  |           |
|------------------|-----------|
| C(13')-H(13D)    | 0.9800    |
| C(13')-H(13E)    | 0.9800    |
| C(13')-H(13F)    | 0.9800    |
| C(14')-C(15')    | 1.470(17) |
| C(14')-H(14')    | 1.0000    |
| C(15')-H(15C)    | 0.9900    |
| C(15')-H(15D)    | 0.9900    |
| C(16)-C(17)      | 1.523(18) |
| C(16)-H(16A)     | 0.9800    |
| C(16)-H(16B)     | 0.9800    |
| C(16)-H(16C)     | 0.9800    |
| C(17)-N(7)       | 1.432(17) |
| C(17)-C(18)      | 1.520(17) |
| C(17)-H(17)      | 1.0000    |
| C(18)-N(8)       | 1.460(17) |
| C(18)-H(18A)     | 0.9900    |
| C(18)-H(18B)     | 0.9900    |
| N(7)-Cu(7)       | 1.94(2)   |
| N(7)-H(7D)       | 0.9100    |
| N(7)-H(7E)       | 0.9100    |
| N(8)-Cu(7)       | 2.00(2)   |
| N(8)-H(8A)       | 0.9100    |
| N(8)-H(8B)       | 0.9100    |
| Cl(1A)-Cu(7)     | 2.234(7)  |
| Cu(7)-O(43)      | 2.82(4)   |
| Cu(7')-O(42)     | 1.91(2)   |
| Cu(7')-O(43A)    | 2.80(3)   |
| Cl(1)-Na(1)      | 2.318(19) |
| Na(1)-O(47)      | 2.59(2)   |
| Na(1)-O(43B)     | 2.83(5)   |
| O(34)-P(1)-O(33) | 110.2(2)  |
| O(34)-P(1)-O(31) | 109.6(2)  |
| O(33)-P(1)-O(31) | 108.8(2)  |
| O(34)-P(1)-O(32) | 111.7(2)  |
| O(33)-P(1)-O(32) | 108.6(2)  |
| O(31)-P(1)-O(32) | 107.9(2)  |
| O(4)-W(1)-O(12)  | 101.5(2)  |
| O(4)-W(1)-O(7)   | 99.9(2)   |

|                  |            |
|------------------|------------|
| O(12)-W(1)-O(7)  | 90.5(2)    |
| O(4)-W(1)-O(1)   | 103.0(2)   |
| O(12)-W(1)-O(1)  | 155.38(18) |
| O(7)-W(1)-O(1)   | 87.3(2)    |
| O(4)-W(1)-O(3)   | 102.5(2)   |
| O(12)-W(1)-O(3)  | 87.9(2)    |
| O(7)-W(1)-O(3)   | 157.45(19) |
| O(1)-W(1)-O(3)   | 84.9(2)    |
| O(4)-W(1)-O(31)  | 170.0(2)   |
| O(12)-W(1)-O(31) | 71.79(16)  |
| O(7)-W(1)-O(31)  | 73.26(16)  |
| O(1)-W(1)-O(31)  | 84.15(16)  |
| O(3)-W(1)-O(31)  | 84.90(16)  |
| O(5)-W(2)-O(8)   | 102.4(2)   |
| O(5)-W(2)-O(9)   | 102.0(2)   |
| O(8)-W(2)-O(9)   | 91.4(2)    |
| O(5)-W(2)-O(1)   | 102.2(2)   |
| O(8)-W(2)-O(1)   | 89.1(2)    |
| O(9)-W(2)-O(1)   | 155.04(18) |
| O(5)-W(2)-O(2)   | 102.1(2)   |
| O(8)-W(2)-O(2)   | 155.25(18) |
| O(9)-W(2)-O(2)   | 86.7(2)    |
| O(1)-W(2)-O(2)   | 82.5(2)    |
| O(5)-W(2)-O(32)  | 172.1(2)   |
| O(8)-W(2)-O(32)  | 72.66(16)  |
| O(9)-W(2)-O(32)  | 72.33(17)  |
| O(1)-W(2)-O(32)  | 84.06(16)  |
| O(2)-W(2)-O(32)  | 83.31(16)  |
| O(6)-W(3)-O(2)   | 103.2(2)   |
| O(6)-W(3)-O(11)  | 101.5(2)   |
| O(2)-W(3)-O(11)  | 155.20(19) |
| O(6)-W(3)-O(10)  | 101.2(2)   |
| O(2)-W(3)-O(10)  | 88.8(2)    |
| O(11)-W(3)-O(10) | 88.1(2)    |
| O(6)-W(3)-O(3)   | 102.2(2)   |
| O(2)-W(3)-O(3)   | 85.6(2)    |
| O(11)-W(3)-O(3)  | 87.5(2)    |
| O(10)-W(3)-O(3)  | 156.62(19) |

|                  |            |
|------------------|------------|
| O(6)-W(3)-O(33)  | 170.2(2)   |
| O(2)-W(3)-O(33)  | 84.24(17)  |
| O(11)-W(3)-O(33) | 71.39(16)  |
| O(10)-W(3)-O(33) | 72.29(17)  |
| O(3)-W(3)-O(33)  | 84.55(17)  |
| O(19)-W(4)-O(25) | 103.7(2)   |
| O(19)-W(4)-O(18) | 101.3(2)   |
| O(25)-W(4)-O(18) | 93.28(19)  |
| O(19)-W(4)-O(13) | 100.6(2)   |
| O(25)-W(4)-O(13) | 88.26(19)  |
| O(18)-W(4)-O(13) | 157.06(19) |
| O(19)-W(4)-O(7)  | 98.3(2)    |
| O(25)-W(4)-O(7)  | 157.84(19) |
| O(18)-W(4)-O(7)  | 84.69(19)  |
| O(13)-W(4)-O(7)  | 85.34(18)  |
| O(19)-W(4)-O(31) | 169.09(19) |
| O(25)-W(4)-O(31) | 86.51(17)  |
| O(18)-W(4)-O(31) | 73.98(17)  |
| O(13)-W(4)-O(31) | 83.29(16)  |
| O(7)-W(4)-O(31)  | 71.70(16)  |
| O(20)-W(5)-O(26) | 103.7(2)   |
| O(20)-W(5)-O(13) | 100.0(2)   |
| O(26)-W(5)-O(13) | 96.21(19)  |
| O(20)-W(5)-O(14) | 99.8(2)    |
| O(26)-W(5)-O(14) | 90.74(19)  |
| O(13)-W(5)-O(14) | 156.76(19) |
| O(20)-W(5)-O(8)  | 99.23(19)  |
| O(26)-W(5)-O(8)  | 156.65(18) |
| O(13)-W(5)-O(8)  | 84.14(18)  |
| O(14)-W(5)-O(8)  | 80.84(19)  |
| O(20)-W(5)-O(32) | 170.38(18) |
| O(26)-W(5)-O(32) | 84.20(16)  |
| O(13)-W(5)-O(32) | 84.37(16)  |
| O(14)-W(5)-O(32) | 74.28(16)  |
| O(8)-W(5)-O(32)  | 72.58(16)  |
| O(21)-W(6)-O(27) | 104.4(2)   |
| O(21)-W(6)-O(14) | 102.7(2)   |
| O(27)-W(6)-O(14) | 90.66(19)  |



|                  |            |
|------------------|------------|
| O(21)-W(6)-O(15) | 100.0(2)   |
| O(27)-W(6)-O(15) | 92.46(19)  |
| O(14)-W(6)-O(15) | 155.5(2)   |
| O(21)-W(6)-O(9)  | 99.5(2)    |
| O(27)-W(6)-O(9)  | 155.9(2)   |
| O(14)-W(6)-O(9)  | 81.91(19)  |
| O(15)-W(6)-O(9)  | 85.4(2)    |
| O(21)-W(6)-O(32) | 170.8(2)   |
| O(27)-W(6)-O(32) | 84.19(17)  |
| O(14)-W(6)-O(32) | 73.41(16)  |
| O(15)-W(6)-O(32) | 82.74(17)  |
| O(9)-W(6)-O(32)  | 71.77(17)  |
| O(22)-W(7)-O(28) | 103.4(2)   |
| O(22)-W(7)-O(15) | 100.7(2)   |
| O(28)-W(7)-O(15) | 89.89(19)  |
| O(22)-W(7)-O(16) | 103.0(2)   |
| O(28)-W(7)-O(16) | 88.82(18)  |
| O(15)-W(7)-O(16) | 156.0(2)   |
| O(22)-W(7)-O(10) | 99.5(2)    |
| O(28)-W(7)-O(10) | 157.1(2)   |
| O(15)-W(7)-O(10) | 87.5(2)    |
| O(16)-W(7)-O(10) | 84.5(2)    |
| O(22)-W(7)-O(33) | 171.2(2)   |
| O(28)-W(7)-O(33) | 84.66(16)  |
| O(15)-W(7)-O(33) | 82.64(17)  |
| O(16)-W(7)-O(33) | 73.35(17)  |
| O(10)-W(7)-O(33) | 72.44(17)  |
| O(23)-W(8)-O(29) | 103.6(2)   |
| O(23)-W(8)-O(16) | 102.6(2)   |
| O(29)-W(8)-O(16) | 88.66(19)  |
| O(23)-W(8)-O(17) | 100.4(2)   |
| O(29)-W(8)-O(17) | 91.16(19)  |
| O(16)-W(8)-O(17) | 156.36(18) |
| O(23)-W(8)-O(11) | 99.0(2)    |
| O(29)-W(8)-O(11) | 157.25(19) |
| O(16)-W(8)-O(11) | 84.3(2)    |
| O(17)-W(8)-O(11) | 86.8(2)    |
| O(23)-W(8)-O(33) | 170.3(2)   |

|                   |            |
|-------------------|------------|
| O(29)-W(8)-O(33)  | 85.46(16)  |
| O(16)-W(8)-O(33)  | 74.00(17)  |
| O(17)-W(8)-O(33)  | 82.41(17)  |
| O(11)-W(8)-O(33)  | 71.81(16)  |
| O(24)-W(9)-O(30)  | 104.2(2)   |
| O(24)-W(9)-O(17)  | 99.7(2)    |
| O(30)-W(9)-O(17)  | 92.03(19)  |
| O(24)-W(9)-O(18)  | 101.4(2)   |
| O(30)-W(9)-O(18)  | 90.14(19)  |
| O(17)-W(9)-O(18)  | 157.62(19) |
| O(24)-W(9)-O(12)  | 99.9(2)    |
| O(30)-W(9)-O(12)  | 155.80(19) |
| O(17)-W(9)-O(12)  | 86.77(19)  |
| O(18)-W(9)-O(12)  | 82.23(19)  |
| O(24)-W(9)-O(31)  | 169.74(18) |
| O(30)-W(9)-O(31)  | 84.95(16)  |
| O(17)-W(9)-O(31)  | 84.47(17)  |
| O(18)-W(9)-O(31)  | 73.53(16)  |
| O(12)-W(9)-O(31)  | 70.87(16)  |
| O(35)-Cu(1)-O(38) | 96.0(2)    |
| O(35)-Cu(1)-O(30) | 172.53(17) |
| O(38)-Cu(1)-O(30) | 89.8(2)    |
| O(35)-Cu(1)-O(34) | 84.36(17)  |
| O(38)-Cu(1)-O(34) | 179.31(19) |
| O(30)-Cu(1)-O(34) | 89.85(17)  |
| O(35)-Cu(1)-O(36) | 97.12(17)  |
| O(38)-Cu(1)-O(36) | 94.24(18)  |
| O(30)-Cu(1)-O(36) | 87.06(17)  |
| O(34)-Cu(1)-O(36) | 85.12(16)  |
| O(35)-Cu(1)-O(25) | 80.69(17)  |
| O(38)-Cu(1)-O(25) | 92.65(18)  |
| O(30)-Cu(1)-O(25) | 94.42(17)  |
| O(34)-Cu(1)-O(25) | 87.99(16)  |
| O(36)-Cu(1)-O(25) | 172.96(16) |
| O(35)-Cu(1)-Cu(4) | 41.58(12)  |
| O(38)-Cu(1)-Cu(4) | 85.05(15)  |
| O(30)-Cu(1)-Cu(4) | 134.92(13) |
| O(34)-Cu(1)-Cu(4) | 95.61(12)  |

|                   |            |
|-------------------|------------|
| O(36)-Cu(1)-Cu(4) | 137.94(11) |
| O(25)-Cu(1)-Cu(4) | 41.41(11)  |
| O(36)-Cu(2)-O(28) | 173.69(18) |
| O(36)-Cu(2)-O(37) | 95.40(18)  |
| O(28)-Cu(2)-O(37) | 82.03(18)  |
| O(36)-Cu(2)-O(29) | 81.26(18)  |
| O(28)-Cu(2)-O(29) | 99.91(18)  |
| O(37)-Cu(2)-O(29) | 166.48(17) |
| O(36)-Cu(2)-O(40) | 97.37(19)  |
| O(28)-Cu(2)-O(40) | 88.53(19)  |
| O(37)-Cu(2)-O(40) | 92.6(2)    |
| O(29)-Cu(2)-O(40) | 100.9(2)   |
| O(36)-Cu(2)-O(34) | 84.16(16)  |
| O(28)-Cu(2)-O(34) | 89.72(16)  |
| O(37)-Cu(2)-O(34) | 80.30(15)  |
| O(29)-Cu(2)-O(34) | 86.31(15)  |
| O(40)-Cu(2)-O(34) | 172.8(2)   |
| O(36)-Cu(2)-Cu(6) | 135.94(13) |
| O(28)-Cu(2)-Cu(6) | 42.73(12)  |
| O(37)-Cu(2)-Cu(6) | 41.28(13)  |
| O(29)-Cu(2)-Cu(6) | 142.63(13) |
| O(40)-Cu(2)-Cu(6) | 80.76(17)  |
| O(34)-Cu(2)-Cu(6) | 93.23(10)  |
| O(36)-Cu(2)-Cu(5) | 39.51(13)  |
| O(28)-Cu(2)-Cu(5) | 142.30(13) |
| O(37)-Cu(2)-Cu(5) | 134.79(13) |
| O(29)-Cu(2)-Cu(5) | 42.44(13)  |
| O(40)-Cu(2)-Cu(5) | 96.10(17)  |
| O(34)-Cu(2)-Cu(5) | 89.55(10)  |
| Cu(6)-Cu(2)-Cu(5) | 174.35(3)  |
| O(35)-Cu(3)-O(27) | 170.65(18) |
| O(35)-Cu(3)-O(37) | 95.39(18)  |
| O(27)-Cu(3)-O(37) | 85.30(18)  |
| O(35)-Cu(3)-O(26) | 84.95(17)  |
| O(27)-Cu(3)-O(26) | 92.83(17)  |
| O(37)-Cu(3)-O(26) | 170.41(17) |
| O(35)-Cu(3)-O(41) | 93.1(2)    |
| O(27)-Cu(3)-O(41) | 96.1(2)    |

|                     |            |
|---------------------|------------|
| O(37)-Cu(3)-O(41)   | 97.58(19)  |
| O(26)-Cu(3)-O(41)   | 91.98(19)  |
| O(35)-Cu(3)-O(34)   | 78.23(16)  |
| O(27)-Cu(3)-O(34)   | 92.64(16)  |
| O(37)-Cu(3)-O(34)   | 82.60(15)  |
| O(26)-Cu(3)-O(34)   | 88.09(16)  |
| O(41)-Cu(3)-O(34)   | 171.2(2)   |
| O(25)-Cu(4)-N(2)    | 177.7(2)   |
| O(25)-Cu(4)-O(35)   | 86.46(18)  |
| N(2)-Cu(4)-O(35)    | 94.6(2)    |
| O(25)-Cu(4)-N(1)    | 94.3(2)    |
| N(2)-Cu(4)-N(1)     | 85.1(3)    |
| O(35)-Cu(4)-N(1)    | 169.8(3)   |
| O(25)-Cu(4)-O(39)   | 86.1(2)    |
| N(2)-Cu(4)-O(39)    | 91.8(3)    |
| O(35)-Cu(4)-O(39)   | 88.9(2)    |
| N(1)-Cu(4)-O(39)    | 101.4(3)   |
| O(25)-Cu(4)-Cu(1)   | 48.42(13)  |
| N(2)-Cu(4)-Cu(1)    | 132.0(2)   |
| O(35)-Cu(4)-Cu(1)   | 40.55(13)  |
| N(1)-Cu(4)-Cu(1)    | 142.36(19) |
| O(39)-Cu(4)-Cu(1)   | 75.07(14)  |
| O(36)-Cu(5)-N(3')   | 179.0(3)   |
| O(36)-Cu(5)-N(4)    | 179.0(3)   |
| O(36)-Cu(5)-N(4')   | 96.2(3)    |
| N(3')-Cu(5)-N(4')   | 84.8(3)    |
| O(36)-Cu(5)-N(3)    | 96.2(3)    |
| N(4)-Cu(5)-N(3)     | 84.8(3)    |
| O(36)-Cu(5)-O(29)   | 80.47(18)  |
| N(3')-Cu(5)-O(29)   | 98.5(3)    |
| N(4)-Cu(5)-O(29)    | 98.5(3)    |
| N(4')-Cu(5)-O(29)   | 170.6(2)   |
| N(3)-Cu(5)-O(29)    | 170.6(2)   |
| O(36)-Cu(5)-O(20)#1 | 88.50(17)  |
| N(4)-Cu(5)-O(20)#1  | 91.4(2)    |
| N(3)-Cu(5)-O(20)#1  | 93.8(2)    |
| O(29)-Cu(5)-O(20)#1 | 94.90(17)  |
| O(36)-Cu(5)-O(30)   | 82.22(16)  |

|                     |            |
|---------------------|------------|
| N(3')-Cu(5)-O(30)   | 97.9(2)    |
| N(4)-Cu(5)-O(30)    | 97.9(2)    |
| N(4')-Cu(5)-O(30)   | 86.6(2)    |
| N(3)-Cu(5)-O(30)    | 86.6(2)    |
| O(29)-Cu(5)-O(30)   | 84.22(16)  |
| O(20)#1-Cu(5)-O(30) | 170.70(15) |
| O(36)-Cu(5)-Cu(2)   | 39.15(13)  |
| N(3')-Cu(5)-Cu(2)   | 139.9(2)   |
| N(4)-Cu(5)-Cu(2)    | 139.9(2)   |
| N(4')-Cu(5)-Cu(2)   | 135.3(2)   |
| N(3)-Cu(5)-Cu(2)    | 135.3(2)   |
| O(29)-Cu(5)-Cu(2)   | 42.01(12)  |
| O(20)#1-Cu(5)-Cu(2) | 86.32(12)  |
| O(30)-Cu(5)-Cu(2)   | 86.86(10)  |
| O(37)-Cu(6)-N(5')   | 177.2(3)   |
| O(37)-Cu(6)-N(6)    | 177.2(3)   |
| O(37)-Cu(6)-N(6')   | 94.5(3)    |
| N(5')-Cu(6)-N(6')   | 85.1(3)    |
| O(37)-Cu(6)-N(5)    | 94.5(3)    |
| N(6)-Cu(6)-N(5)     | 85.1(3)    |
| O(37)-Cu(6)-O(28)   | 81.93(17)  |
| N(5')-Cu(6)-O(28)   | 99.0(3)    |
| N(6)-Cu(6)-O(28)    | 99.0(3)    |
| N(6')-Cu(6)-O(28)   | 168.4(3)   |
| N(5)-Cu(6)-O(28)    | 168.4(3)   |
| O(37)-Cu(6)-O(27)   | 77.25(17)  |
| N(5')-Cu(6)-O(27)   | 100.1(2)   |
| N(6)-Cu(6)-O(27)    | 100.1(2)   |
| N(6')-Cu(6)-O(27)   | 102.2(3)   |
| N(5)-Cu(6)-O(27)    | 102.2(3)   |
| O(28)-Cu(6)-O(27)   | 87.80(16)  |
| O(37)-Cu(6)-Cu(2)   | 42.56(12)  |
| N(5')-Cu(6)-Cu(2)   | 139.0(2)   |
| N(6)-Cu(6)-Cu(2)    | 139.0(2)   |
| N(6')-Cu(6)-Cu(2)   | 131.6(2)   |
| N(5)-Cu(6)-Cu(2)    | 131.6(2)   |
| O(28)-Cu(6)-Cu(2)   | 41.35(12)  |
| O(27)-Cu(6)-Cu(2)   | 90.10(11)  |

|                    |           |
|--------------------|-----------|
| W(1)-O(1)-W(2)     | 153.0(3)  |
| W(3)-O(2)-W(2)     | 153.3(3)  |
| W(3)-O(3)-W(1)     | 149.8(3)  |
| W(1)-O(7)-W(4)     | 124.4(2)  |
| W(2)-O(8)-W(5)     | 124.6(2)  |
| W(2)-O(9)-W(6)     | 126.1(2)  |
| W(3)-O(10)-W(7)    | 126.4(2)  |
| W(3)-O(11)-W(8)    | 127.1(2)  |
| W(1)-O(12)-W(9)    | 126.4(2)  |
| W(5)-O(13)-W(4)    | 147.3(2)  |
| W(6)-O(14)-W(5)    | 122.5(2)  |
| W(7)-O(15)-W(6)    | 152.8(3)  |
| W(8)-O(16)-W(7)    | 124.6(2)  |
| W(9)-O(17)-W(8)    | 150.5(2)  |
| W(4)-O(18)-W(9)    | 122.9(2)  |
| W(4)-O(19)-Cu(7)   | 160.8(3)  |
| W(4)-O(19)-Cu(7')  | 165.2(4)  |
| W(4)-O(19)-Na(1)   | 151.1(4)  |
| W(5)-O(20)-Cu(5)#2 | 128.5(2)  |
| W(4)-O(25)-Cu(4)   | 138.0(2)  |
| W(4)-O(25)-Cu(1)   | 130.1(2)  |
| Cu(4)-O(25)-Cu(1)  | 90.17(17) |
| W(5)-O(26)-Cu(3)   | 138.4(2)  |
| W(6)-O(27)-Cu(3)   | 138.3(2)  |
| W(6)-O(27)-Cu(6)   | 122.2(2)  |
| Cu(3)-O(27)-Cu(6)  | 92.71(17) |
| W(7)-O(28)-Cu(2)   | 134.5(2)  |
| W(7)-O(28)-Cu(6)   | 127.4(2)  |
| Cu(2)-O(28)-Cu(6)  | 95.92(18) |
| W(8)-O(29)-Cu(2)   | 133.5(2)  |
| W(8)-O(29)-Cu(5)   | 128.7(2)  |
| Cu(2)-O(29)-Cu(5)  | 95.54(18) |
| W(9)-O(30)-Cu(1)   | 139.2(2)  |
| W(9)-O(30)-Cu(5)   | 123.3(2)  |
| Cu(1)-O(30)-Cu(5)  | 91.47(15) |
| P(1)-O(31)-W(9)    | 122.7(2)  |
| P(1)-O(31)-W(4)    | 125.0(2)  |
| W(9)-O(31)-W(4)    | 88.80(14) |

|                   |            |
|-------------------|------------|
| P(1)-O(31)-W(1)   | 128.2(2)   |
| W(9)-O(31)-W(1)   | 90.71(14)  |
| W(4)-O(31)-W(1)   | 90.06(13)  |
| P(1)-O(32)-W(5)   | 125.4(2)   |
| P(1)-O(32)-W(6)   | 126.0(2)   |
| W(5)-O(32)-W(6)   | 88.36(13)  |
| P(1)-O(32)-W(2)   | 126.3(2)   |
| W(5)-O(32)-W(2)   | 89.76(13)  |
| W(6)-O(32)-W(2)   | 89.14(13)  |
| P(1)-O(33)-W(8)   | 126.2(2)   |
| P(1)-O(33)-W(7)   | 126.3(2)   |
| W(8)-O(33)-W(7)   | 87.86(13)  |
| P(1)-O(33)-W(3)   | 126.1(2)   |
| W(8)-O(33)-W(3)   | 89.41(13)  |
| W(7)-O(33)-W(3)   | 88.65(14)  |
| P(1)-O(34)-Cu(1)  | 130.2(2)   |
| P(1)-O(34)-Cu(3)  | 121.8(2)   |
| Cu(1)-O(34)-Cu(3) | 91.58(15)  |
| P(1)-O(34)-Cu(2)  | 122.4(2)   |
| Cu(1)-O(34)-Cu(2) | 91.14(14)  |
| Cu(3)-O(34)-Cu(2) | 88.44(13)  |
| Cu(1)-O(35)-Cu(3) | 105.25(19) |
| Cu(1)-O(35)-Cu(4) | 97.87(19)  |
| Cu(3)-O(35)-Cu(4) | 108.4(2)   |
| Cu(1)-O(35)-H(35) | 119(5)     |
| Cu(3)-O(35)-H(35) | 109(5)     |
| Cu(4)-O(35)-H(35) | 116(5)     |
| Cu(2)-O(36)-Cu(5) | 101.3(2)   |
| Cu(2)-O(36)-Cu(1) | 99.26(17)  |
| Cu(5)-O(36)-Cu(1) | 98.35(18)  |
| Cu(2)-O(36)-H(36) | 116(5)     |
| Cu(5)-O(36)-H(36) | 110(5)     |
| Cu(1)-O(36)-H(36) | 128(5)     |
| Cu(6)-O(37)-Cu(3) | 103.97(19) |
| Cu(6)-O(37)-Cu(2) | 96.17(18)  |
| Cu(3)-O(37)-Cu(2) | 108.65(19) |
| Cu(6)-O(37)-H(37) | 113(5)     |
| Cu(3)-O(37)-H(37) | 122(5)     |

|                   |           |
|-------------------|-----------|
| Cu(2)-O(37)-H(37) | 110(5)    |
| C(6)-O(38)-Cu(1)  | 127.5(5)  |
| C(6)-O(39)-Cu(4)  | 124.4(5)  |
| C(3')-C(1)-C(2)   | 121(2)    |
| C(3')-C(1)-H(1)   | 119.6     |
| C(2)-C(1)-H(1)    | 119.6     |
| C(1)-C(2)-C(3)    | 119.5(18) |
| C(1)-C(2)-C(6)    | 115.1(17) |
| C(3)-C(2)-C(6)    | 125.4(17) |
| C(4)-C(3)-C(2)    | 122(2)    |
| C(4)-C(3)-C(1')   | 118.8(17) |
| C(2)-C(3)-C(1')   | 119.5(18) |
| C(5)-C(4)-C(3)    | 119.3(16) |
| C(5)-C(4)-H(4)    | 120.4     |
| C(3)-C(4)-H(4)    | 120.4     |
| C(4)-C(5)-C(5')   | 122.6(15) |
| C(4)-C(5)-H(5)    | 118.7     |
| C(5')-C(5)-H(5)   | 118.7     |
| C(2')-C(1')-C(4') | 122(2)    |
| C(2')-C(1')-C(3)  | 118.8(17) |
| C(4')-C(1')-C(3)  | 119.5(19) |
| C(3')-C(2')-C(1') | 121(2)    |
| C(1)-C(3')-C(2')  | 120(2)    |
| C(1)-C(3')-H(3')  | 119.8     |
| C(2')-C(3')-H(3') | 119.8     |
| C(5')-C(4')-C(1') | 120.3(18) |
| C(5')-C(4')-H(4') | 119.9     |
| C(1')-C(4')-H(4') | 119.9     |
| C(5)-C(5')-C(4')  | 119.1(16) |
| C(5)-C(5')-H(5')  | 120.4     |
| C(4')-C(5')-H(5') | 120.4     |
| O(39)-C(6)-O(38)  | 126.5(7)  |
| O(39)-C(6)-C(2)   | 118.7(11) |
| O(38)-C(6)-C(2)   | 114.1(11) |
| C(8)-N(1)-Cu(4)   | 107.3(6)  |
| C(8)-N(1)-H(1A)   | 110.3     |
| Cu(4)-N(1)-H(1A)  | 110.3     |
| C(8)-N(1)-H(1B)   | 110.3     |



|                  |           |
|------------------|-----------|
| Cu(4)-N(1)-H(1B) | 110.3     |
| H(1A)-N(1)-H(1B) | 108.5     |
| C(9)-N(2)-Cu(4)  | 109.4(5)  |
| C(9)-N(2)-H(2A)  | 109.8     |
| Cu(4)-N(2)-H(2A) | 109.8     |
| C(9)-N(2)-H(2B)  | 109.8     |
| Cu(4)-N(2)-H(2B) | 109.8     |
| H(2A)-N(2)-H(2B) | 108.2     |
| C(8)-C(7)-H(7A)  | 109.5     |
| C(8)-C(7)-H(7B)  | 109.5     |
| H(7A)-C(7)-H(7B) | 109.5     |
| C(8)-C(7)-H(7C)  | 109.5     |
| H(7A)-C(7)-H(7C) | 109.5     |
| H(7B)-C(7)-H(7C) | 109.5     |
| C(9)-C(8)-C(7)   | 120.3(12) |
| C(9)-C(8)-N(1)   | 106.7(9)  |
| C(7)-C(8)-N(1)   | 112.4(11) |
| C(9)-C(8)-H(8)   | 105.4     |
| C(7)-C(8)-H(8)   | 105.4     |
| N(1)-C(8)-H(8)   | 105.4     |
| N(2)-C(9)-C(8)   | 110.1(9)  |
| N(2)-C(9)-H(9A)  | 109.6     |
| C(8)-C(9)-H(9A)  | 109.6     |
| N(2)-C(9)-H(9B)  | 109.6     |
| C(8)-C(9)-H(9B)  | 109.6     |
| H(9A)-C(9)-H(9B) | 108.2     |
| C(11)-N(3)-Cu(5) | 107.9(6)  |
| C(11)-N(3)-H(3A) | 110.1     |
| Cu(5)-N(3)-H(3A) | 110.1     |
| C(11)-N(3)-H(3B) | 110.1     |
| Cu(5)-N(3)-H(3B) | 110.1     |
| H(3A)-N(3)-H(3B) | 108.4     |
| C(12)-N(4)-Cu(5) | 108.0(6)  |
| C(12)-N(4)-H(4A) | 110.1     |
| Cu(5)-N(4)-H(4A) | 110.1     |
| C(12)-N(4)-H(4B) | 110.1     |
| Cu(5)-N(4)-H(4B) | 110.1     |
| H(4A)-N(4)-H(4B) | 108.4     |

|                      |           |
|----------------------|-----------|
| C(11)-C(10)-H(10A)   | 109.5     |
| C(11)-C(10)-H(10B)   | 109.5     |
| H(10A)-C(10)-H(10B)  | 109.5     |
| C(11)-C(10)-H(10C)   | 109.5     |
| H(10A)-C(10)-H(10C)  | 109.5     |
| H(10B)-C(10)-H(10C)  | 109.5     |
| N(3)-C(11)-C(12)     | 107.0(7)  |
| N(3)-C(11)-C(10)     | 118.4(11) |
| C(12)-C(11)-C(10)    | 106.3(9)  |
| N(3)-C(11)-H(11)     | 108.2     |
| C(12)-C(11)-H(11)    | 108.2     |
| C(10)-C(11)-H(11)    | 108.2     |
| C(11)-C(12)-N(4)     | 107.6(7)  |
| C(11)-C(12)-H(12A)   | 110.2     |
| N(4)-C(12)-H(12A)    | 110.2     |
| C(11)-C(12)-H(12B)   | 110.2     |
| N(4)-C(12)-H(12B)    | 110.2     |
| H(12A)-C(12)-H(12B)  | 108.5     |
| C(11')-N(3')-Cu(5)   | 108.0(6)  |
| C(11')-N(3')-H(3'A)  | 110.1     |
| Cu(5)-N(3')-H(3'A)   | 110.1     |
| C(11')-N(3')-H(3'B)  | 110.1     |
| Cu(5)-N(3')-H(3'B)   | 110.1     |
| H(3'A)-N(3')-H(3'B)  | 108.4     |
| C(12')-N(4')-Cu(5)   | 107.9(6)  |
| C(12')-N(4')-H(4'A)  | 110.1     |
| Cu(5)-N(4')-H(4'A)   | 110.1     |
| C(12')-N(4')-H(4'B)  | 110.1     |
| Cu(5)-N(4')-H(4'B)   | 110.1     |
| H(4'A)-N(4')-H(4'B)  | 108.4     |
| C(11')-C(10')-H(10D) | 109.5     |
| C(11')-C(10')-H(10E) | 109.5     |
| H(10D)-C(10')-H(10E) | 109.5     |
| C(11')-C(10')-H(10F) | 109.5     |
| H(10D)-C(10')-H(10F) | 109.5     |
| H(10E)-C(10')-H(10F) | 109.5     |
| C(12')-C(11')-C(10') | 95.8(13)  |
| C(12')-C(11')-N(3')  | 107.6(7)  |

|                      |           |
|----------------------|-----------|
| C(10')-C(11')-N(3')  | 126.8(14) |
| C(12')-C(11')-H(11') | 108.3     |
| C(10')-C(11')-H(11') | 108.3     |
| N(3')-C(11')-H(11')  | 108.3     |
| N(4')-C(12')-C(11')  | 107.0(7)  |
| N(4')-C(12')-H(12C)  | 110.3     |
| C(11')-C(12')-H(12C) | 110.3     |
| N(4')-C(12')-H(12D)  | 110.3     |
| C(11')-C(12')-H(12D) | 110.3     |
| H(12C)-C(12')-H(12D) | 108.6     |
| C(14)-N(5)-Cu(6)     | 108.8(6)  |
| C(14)-N(5)-H(5A)     | 109.9     |
| Cu(6)-N(5)-H(5A)     | 109.9     |
| C(14)-N(5)-H(5B)     | 109.9     |
| Cu(6)-N(5)-H(5B)     | 109.9     |
| H(5A)-N(5)-H(5B)     | 108.3     |
| C(15)-N(6)-Cu(6)     | 107.2(7)  |
| C(15)-N(6)-H(6A)     | 110.3     |
| Cu(6)-N(6)-H(6A)     | 110.3     |
| C(15)-N(6)-H(6B)     | 110.3     |
| Cu(6)-N(6)-H(6B)     | 110.3     |
| H(6A)-N(6)-H(6B)     | 108.5     |
| C(14)-C(13)-H(13A)   | 109.5     |
| C(14)-C(13)-H(13B)   | 109.5     |
| H(13A)-C(13)-H(13B)  | 109.5     |
| C(14)-C(13)-H(13C)   | 109.5     |
| H(13A)-C(13)-H(13C)  | 109.5     |
| H(13B)-C(13)-H(13C)  | 109.5     |
| C(13)-C(14)-C(15)    | 118.2(17) |
| C(13)-C(14)-N(5)     | 124.4(15) |
| C(15)-C(14)-N(5)     | 107.5(9)  |
| C(13)-C(14)-H(14)    | 100.5     |
| C(15)-C(14)-H(14)    | 100.5     |
| N(5)-C(14)-H(14)     | 100.5     |
| N(6)-C(15)-C(14)     | 108.2(9)  |
| N(6)-C(15)-H(15A)    | 110.1     |
| C(14)-C(15)-H(15A)   | 110.1     |
| N(6)-C(15)-H(15B)    | 110.1     |

|                      |           |
|----------------------|-----------|
| C(14)-C(15)-H(15B)   | 110.1     |
| H(15A)-C(15)-H(15B)  | 108.4     |
| C(14')-N(5')-Cu(6)   | 107.2(7)  |
| C(14')-N(5')-H(5'A)  | 110.3     |
| Cu(6)-N(5')-H(5'A)   | 110.3     |
| C(14')-N(5')-H(5'B)  | 110.3     |
| Cu(6)-N(5')-H(5'B)   | 110.3     |
| H(5'A)-N(5')-H(5'B)  | 108.5     |
| C(15')-N(6')-Cu(6)   | 108.8(6)  |
| C(15')-N(6')-H(6'A)  | 109.9     |
| Cu(6)-N(6')-H(6'A)   | 109.9     |
| C(15')-N(6')-H(6'B)  | 109.9     |
| Cu(6)-N(6')-H(6'B)   | 109.9     |
| H(6'A)-N(6')-H(6'B)  | 108.3     |
| C(14')-C(13')-H(13D) | 109.5     |
| C(14')-C(13')-H(13E) | 109.5     |
| H(13D)-C(13')-H(13E) | 109.5     |
| C(14')-C(13')-H(13F) | 109.5     |
| H(13D)-C(13')-H(13F) | 109.5     |
| H(13E)-C(13')-H(13F) | 109.5     |
| N(5')-C(14')-C(13')  | 124.7(16) |
| N(5')-C(14')-C(15')  | 108.2(9)  |
| C(13')-C(14')-C(15') | 117.4(15) |
| N(5')-C(14')-H(14')  | 100.4     |
| C(13')-C(14')-H(14') | 100.4     |
| C(15')-C(14')-H(14') | 100.4     |
| C(14')-C(15')-N(6')  | 107.5(9)  |
| C(14')-C(15')-H(15C) | 110.2     |
| N(6')-C(15')-H(15C)  | 110.2     |
| C(14')-C(15')-H(15D) | 110.2     |
| N(6')-C(15')-H(15D)  | 110.2     |
| H(15C)-C(15')-H(15D) | 108.5     |
| C(17)-C(16)-H(16A)   | 109.5     |
| C(17)-C(16)-H(16B)   | 109.5     |
| H(16A)-C(16)-H(16B)  | 109.5     |
| C(17)-C(16)-H(16C)   | 109.5     |
| H(16A)-C(16)-H(16C)  | 109.5     |
| H(16B)-C(16)-H(16C)  | 109.5     |

|                     |           |
|---------------------|-----------|
| N(7)-C(17)-C(18)    | 122(2)    |
| N(7)-C(17)-C(16)    | 110(2)    |
| C(18)-C(17)-C(16)   | 105.6(18) |
| N(7)-C(17)-H(17)    | 106.2     |
| C(18)-C(17)-H(17)   | 106.2     |
| C(16)-C(17)-H(17)   | 106.2     |
| N(8)-C(18)-C(17)    | 101.8(18) |
| N(8)-C(18)-H(18A)   | 111.4     |
| C(17)-C(18)-H(18A)  | 111.4     |
| N(8)-C(18)-H(18B)   | 111.4     |
| C(17)-C(18)-H(18B)  | 111.4     |
| H(18A)-C(18)-H(18B) | 109.3     |
| C(17)-N(7)-Cu(7)    | 105.0(15) |
| C(17)-N(7)-H(7D)    | 110.7     |
| Cu(7)-N(7)-H(7D)    | 110.7     |
| C(17)-N(7)-H(7E)    | 110.7     |
| Cu(7)-N(7)-H(7E)    | 110.7     |
| H(7D)-N(7)-H(7E)    | 108.8     |
| C(18)-N(8)-Cu(7)    | 112.0(15) |
| C(18)-N(8)-H(8A)    | 109.2     |
| Cu(7)-N(8)-H(8A)    | 109.2     |
| C(18)-N(8)-H(8B)    | 109.2     |
| Cu(7)-N(8)-H(8B)    | 109.2     |
| H(8A)-N(8)-H(8B)    | 107.9     |
| N(7)-Cu(7)-N(8)     | 87.5(9)   |
| N(7)-Cu(7)-O(19)    | 102.3(9)  |
| N(8)-Cu(7)-O(19)    | 97.6(5)   |
| N(7)-Cu(7)-Cl(1A)   | 164.5(9)  |
| N(8)-Cu(7)-Cl(1A)   | 93.1(6)   |
| O(19)-Cu(7)-Cl(1A)  | 93.1(2)   |
| N(7)-Cu(7)-O(43)    | 77.8(11)  |
| N(8)-Cu(7)-O(43)    | 164.8(11) |
| O(19)-Cu(7)-O(43)   | 89.2(9)   |
| Cl(1A)-Cu(7)-O(43)  | 100.1(9)  |
| O(42)-Cu(7')-O(19)  | 90.5(7)   |
| O(42)-Cu(7')-O(43A) | 128.3(9)  |
| O(19)-Cu(7')-O(43A) | 71.9(5)   |
| Cl(1)-Na(1)-O(19)   | 85.9(6)   |

|                    |           |
|--------------------|-----------|
| Cl(1)-Na(1)-O(47)  | 101.3(9)  |
| O(19)-Na(1)-O(47)  | 61.9(5)   |
| Cl(1)-Na(1)-O(43B) | 97.5(11)  |
| O(19)-Na(1)-O(43B) | 102.4(7)  |
| O(47)-Na(1)-O(43B) | 154.3(10) |

---

Symmetry transformations used to generate equivalent atoms:

#1  $-x+1, y-1/2, -z+3/2$     #2  $-x+1, y+1/2, -z+3/2$

**Table S5.** Anisotropic displacement parameters ( $\text{\AA}^2 \times 10^3$ ) for platon\_sq. The anisotropic displacement factor exponent takes the form:  $-2\pi^2 [h^2 a^{*2} U_{11} + \dots + 2 h k a^* b^* U_{12}]$

|       | U11   | U22   | U33   | U23   | U13    | U12   |
|-------|-------|-------|-------|-------|--------|-------|
| P(1)  | 7(1)  | 7(1)  | 14(1) | 2(1)  | -2(1)  | 1(1)  |
| W(1)  | 11(1) | 11(1) | 34(1) | -2(1) | -1(1)  | 4(1)  |
| W(2)  | 25(1) | 10(1) | 21(1) | 5(1)  | -7(1)  | 1(1)  |
| W(3)  | 18(1) | 17(1) | 32(1) | 0(1)  | -15(1) | 4(1)  |
| W(4)  | 13(1) | 11(1) | 17(1) | -1(1) | 3(1)   | 1(1)  |
| W(5)  | 13(1) | 9(1)  | 18(1) | 1(1)  | 1(1)   | -3(1) |
| W(6)  | 28(1) | 14(1) | 13(1) | 3(1)  | 3(1)   | -2(1) |
| W(7)  | 23(1) | 18(1) | 16(1) | -3(1) | -10(1) | 3(1)  |
| W(8)  | 10(1) | 12(1) | 38(1) | -2(1) | -7(1)  | -1(1) |
| W(9)  | 11(1) | 10(1) | 33(1) | 1(1)  | 10(1)  | 0(1)  |
| Cu(1) | 12(1) | 12(1) | 12(1) | 2(1)  | 2(1)   | 2(1)  |
| Cu(2) | 10(1) | 14(1) | 15(1) | 1(1)  | 0(1)   | 0(1)  |
| Cu(3) | 10(1) | 12(1) | 13(1) | -1(1) | 1(1)   | -1(1) |
| Cu(4) | 12(1) | 21(1) | 19(1) | -4(1) | -2(1)  | 2(1)  |
| Cu(5) | 19(1) | 10(1) | 25(1) | 2(1)  | 9(1)   | 0(1)  |
| Cu(6) | 17(1) | 23(1) | 18(1) | -3(1) | 2(1)   | -1(1) |
| O(1)  | 18(2) | 11(2) | 30(3) | 2(2)  | -3(2)  | 4(2)  |
| O(2)  | 25(2) | 18(2) | 27(3) | 2(2)  | -11(2) | 0(2)  |
| O(3)  | 17(2) | 14(2) | 36(3) | -4(2) | -7(2)  | 4(2)  |
| O(4)  | 18(2) | 20(2) | 58(4) | -9(2) | 0(2)   | 8(2)  |
| O(5)  | 48(3) | 16(2) | 36(3) | 12(2) | -12(3) | -1(2) |
| O(6)  | 29(3) | 31(3) | 49(4) | -1(3) | -24(3) | 9(2)  |
| O(7)  | 15(2) | 12(2) | 30(3) | -2(2) | 4(2)   | 1(2)  |
| O(8)  | 22(2) | 11(2) | 22(2) | 6(2)  | -1(2)  | -1(2) |
| O(9)  | 39(3) | 14(2) | 18(2) | 6(2)  | -4(2)  | -2(2) |
| O(10) | 30(3) | 21(2) | 25(3) | -1(2) | -17(2) | -1(2) |
| O(11) | 10(2) | 19(2) | 42(3) | -3(2) | -13(2) | 2(2)  |
| O(12) | 8(2)  | 16(2) | 41(3) | -2(2) | 5(2)   | 4(2)  |
| O(13) | 15(2) | 10(2) | 19(2) | -2(2) | 1(2)   | -1(2) |

|       |        |        |        |        |        |        |
|-------|--------|--------|--------|--------|--------|--------|
| O(14) | 22(2)  | 15(2)  | 19(2)  | 2(2)   | 5(2)   | -7(2)  |
| O(15) | 30(3)  | 20(2)  | 14(2)  | 1(2)   | -3(2)  | -2(2)  |
| O(16) | 17(2)  | 15(2)  | 33(3)  | -2(2)  | -13(2) | -2(2)  |
| O(17) | 11(2)  | 13(2)  | 34(3)  | -2(2)  | 0(2)   | -3(2)  |
| O(18) | 16(2)  | 14(2)  | 28(3)  | 0(2)   | 11(2)  | -1(2)  |
| O(19) | 31(3)  | 22(2)  | 22(3)  | -7(2)  | 4(2)   | 0(2)   |
| O(20) | 17(2)  | 11(2)  | 31(3)  | -1(2)  | 0(2)   | -5(2)  |
| O(21) | 44(3)  | 27(3)  | 19(3)  | 6(2)   | 8(2)   | -5(2)  |
| O(22) | 42(3)  | 32(3)  | 19(3)  | -9(2)  | -7(2)  | 2(2)   |
| O(23) | 20(3)  | 18(2)  | 65(4)  | -4(2)  | -9(3)  | -5(2)  |
| O(24) | 25(3)  | 18(2)  | 56(4)  | 1(2)   | 26(3)  | 0(2)   |
| O(25) | 16(2)  | 16(2)  | 18(2)  | 0(2)   | 2(2)   | 0(2)   |
| O(26) | 13(2)  | 11(2)  | 17(2)  | -2(2)  | 0(2)   | 1(2)   |
| O(27) | 19(2)  | 13(2)  | 19(2)  | -1(2)  | 1(2)   | -3(2)  |
| O(28) | 13(2)  | 15(2)  | 16(2)  | 0(2)   | -3(2)  | -1(2)  |
| O(29) | 14(2)  | 10(2)  | 25(2)  | 1(2)   | 0(2)   | -1(2)  |
| O(30) | 15(2)  | 11(2)  | 20(2)  | 3(2)   | 9(2)   | 2(2)   |
| O(31) | 9(2)   | 8(2)   | 21(2)  | 1(2)   | 1(2)   | 2(1)   |
| O(32) | 12(2)  | 11(2)  | 17(2)  | 3(2)   | -3(2)  | -2(2)  |
| O(33) | 11(2)  | 12(2)  | 24(2)  | 0(2)   | -6(2)  | -1(2)  |
| O(34) | 11(2)  | 9(2)   | 15(2)  | 1(2)   | 1(2)   | 3(2)   |
| O(35) | 13(2)  | 14(2)  | 16(2)  | -1(2)  | -2(2)  | 5(2)   |
| O(36) | 14(2)  | 12(2)  | 19(2)  | 2(2)   | 2(2)   | 5(2)   |
| O(37) | 10(2)  | 14(2)  | 19(2)  | 0(2)   | -1(2)  | 4(2)   |
| O(38) | 35(3)  | 22(2)  | 20(3)  | 4(2)   | -2(2)  | 0(2)   |
| O(39) | 51(4)  | 56(4)  | 23(3)  | 12(3)  | -16(3) | -20(3) |
| O(40) | 85(5)  | 19(3)  | 35(3)  | 3(2)   | 5(3)   | 15(3)  |
| O(41) | 16(3)  | 44(3)  | 62(4)  | -14(3) | 1(3)   | -3(2)  |
| C(1)  | 37(8)  | 43(8)  | 18(5)  | 3(5)   | 0(6)   | 5(6)   |
| C(2)  | 28(5)  | 28(5)  | 23(3)  | 8(3)   | -5(4)  | 5(4)   |
| C(3)  | 46(8)  | 42(8)  | 18(4)  | 12(5)  | -5(7)  | 3(7)   |
| C(4)  | 28(8)  | 38(8)  | 23(8)  | 4(6)   | 1(6)   | 4(6)   |
| C(5)  | 41(9)  | 46(10) | 29(9)  | 13(7)  | 3(7)   | 16(8)  |
| C(1') | 37(8)  | 43(8)  | 18(5)  | 3(5)   | 0(6)   | 5(6)   |
| C(2') | 28(5)  | 28(5)  | 23(3)  | 8(3)   | -5(4)  | 5(4)   |
| C(3') | 46(8)  | 42(8)  | 18(4)  | 12(5)  | -5(7)  | 3(7)   |
| C(4') | 40(10) | 62(12) | 24(8)  | 16(8)  | 14(7)  | 10(9)  |
| C(5') | 42(11) | 94(17) | 32(10) | 18(10) | 10(8)  | 13(11) |



|        |         |         |         |         |         |         |
|--------|---------|---------|---------|---------|---------|---------|
| C(6)   | 40(4)   | 34(4)   | 18(4)   | 6(3)    | -3(3)   | 1(3)    |
| N(1)   | 23(3)   | 37(4)   | 46(4)   | -21(3)  | -11(3)  | -2(3)   |
| N(2)   | 14(3)   | 52(4)   | 29(3)   | -11(3)  | 0(2)    | 0(3)    |
| C(7)   | 98(12)  | 97(12)  | 200(20) | -71(13) | -36(13) | -31(10) |
| C(8)   | 43(6)   | 50(6)   | 144(13) | -32(7)  | -23(7)  | -2(5)   |
| C(9)   | 23(4)   | 104(10) | 92(9)   | -68(8)  | -1(5)   | -6(5)   |
| N(3)   | 66(5)   | 11(3)   | 26(3)   | 4(2)    | 22(3)   | 6(3)    |
| N(4)   | 30(3)   | 15(3)   | 64(5)   | 3(3)    | 23(3)   | -7(2)   |
| C(10)  | 47(8)   | 47(8)   | 36(7)   | 7(6)    | 19(6)   | 1(6)    |
| C(11)  | 108(9)  | 22(4)   | 50(6)   | -2(4)   | 55(6)   | -2(5)   |
| C(12)  | 84(8)   | 22(4)   | 71(7)   | -4(4)   | 56(6)   | -16(4)  |
| N(3')  | 30(3)   | 15(3)   | 64(5)   | 3(3)    | 23(3)   | -7(2)   |
| N(4')  | 66(5)   | 11(3)   | 26(3)   | 4(2)    | 22(3)   | 6(3)    |
| C(10') | 30(13)  | 42(14)  | 53(17)  | 6(12)   | 6(12)   | -9(11)  |
| C(11') | 84(8)   | 22(4)   | 71(7)   | -4(4)   | 56(6)   | -16(4)  |
| C(12') | 108(9)  | 22(4)   | 50(6)   | -2(4)   | 55(6)   | -2(5)   |
| N(5)   | 21(3)   | 76(6)   | 39(4)   | -12(4)  | 6(3)    | -2(3)   |
| N(6)   | 54(5)   | 41(4)   | 21(3)   | 0(3)    | 6(3)    | 8(3)    |
| C(13)  | 50(13)  | 170(30) | 62(15)  | -54(17) | 17(11)  | -22(16) |
| C(14)  | 45(6)   | 130(12) | 66(8)   | -3(8)   | 33(6)   | 13(7)   |
| C(15)  | 70(8)   | 83(9)   | 81(9)   | 39(7)   | 57(7)   | 20(7)   |
| N(5')  | 54(5)   | 41(4)   | 21(3)   | 0(3)    | 6(3)    | 8(3)    |
| N(6')  | 21(3)   | 76(6)   | 39(4)   | -12(4)  | 6(3)    | -2(3)   |
| C(13') | 120(20) | 87(19)  | 44(14)  | 4(13)   | 29(14)  | -27(17) |
| C(14') | 70(8)   | 83(9)   | 81(9)   | 39(7)   | 57(7)   | 20(7)   |
| C(15') | 45(6)   | 130(12) | 66(8)   | -3(8)   | 33(6)   | 13(7)   |
| C(16)  | 180(20) | 160(20) | 160(20) | 40(20)  | 0(20)   | -40(20) |
| C(17)  | 122(11) | 122(11) | 79(9)   | 30(9)   | 20(9)   | -29(9)  |
| C(18)  | 107(12) | 124(12) | 60(10)  | 29(9)   | 15(10)  | -36(10) |
| N(7)   | 127(12) | 121(11) | 89(10)  | 31(9)   | 27(10)  | -22(10) |
| N(8)   | 82(9)   | 62(8)   | 39(7)   | -24(7)  | -7(7)   | -1(7)   |
| Cl(1A) | 17(3)   | 18(3)   | 10(3)   | -6(2)   | 2(2)    | -5(2)   |
| O(42A) | 17(3)   | 18(3)   | 10(3)   | -6(2)   | 2(2)    | -5(2)   |
| Cu(7)  | 46(1)   | 41(1)   | 26(1)   | -4(1)   | 5(1)    | -4(1)   |
| O(43)  | 89(15)  | 89(14)  | 84(15)  | -8(9)   | -4(9)   | -3(9)   |
| Cu(7') | 39(4)   | 38(4)   | 30(4)   | -3(3)   | 6(3)    | -7(3)   |
| O(42)  | 42(9)   | 11(7)   | 51(10)  | -8(7)   | 18(8)   | 6(7)    |
| O(43A) | 81(15)  | 79(14)  | 37(10)  | -2(10)  | -26(10) | -9(12)  |

|        |        |         |        |         |        |         |
|--------|--------|---------|--------|---------|--------|---------|
| Cl(1)  | 41(5)  | 37(5)   | 24(4)  | -7(3)   | -3(3)  | -7(3)   |
| Na(1)  | 35(6)  | 42(6)   | 33(6)  | -16(5)  | 4(5)   | 14(6)   |
| O(43B) | 80(20) | 140(30) | 29(14) | -36(16) | 6(15)  | -20(20) |
| O(47)  | 85(10) | 74(9)   | 46(8)  | -34(8)  | -27(8) | 32(8)   |
| O(44)  | 39(4)  | 33(3)   | 93(6)  | -22(3)  | -2(4)  | -10(3)  |
| O(45)  | 70(5)  | 32(3)   | 96(6)  | 27(4)   | -20(4) | 8(3)    |
| O(46)  | 84(6)  | 55(5)   | 110(7) | -26(5)  | 38(5)  | 12(4)   |

---

**Table S6.** Hydrogen coordinates ( $\times 10^4$ ) and isotropic displacement parameters ( $\text{\AA}^2 \times 10^3$ ) for platon\_sq.

| x      | y        | z        | U(eq)    |     |
|--------|----------|----------|----------|-----|
| H(35)  | 6920(50) | 5570(20) | 7970(30) | 17  |
| H(36)  | 5120(50) | 4350(20) | 7710(30) | 18  |
| H(37)  | 6760(50) | 4930(20) | 7030(30) | 17  |
| H(1)   | 6879     | 5132     | 9763     | 39  |
| H(4)   | 3061     | 5691     | 9082     | 36  |
| H(5)   | 1088     | 5626     | 9359     | 46  |
| H(3')  | 6453     | 4691     | 10531    | 43  |
| H(4')  | 2240     | 4812     | 10640    | 50  |
| H(5')  | 680      | 5296     | 10156    | 67  |
| H(1A)  | 6142     | 7820     | 8504     | 43  |
| H(1B)  | 6436     | 7507     | 8982     | 43  |
| H(2A)  | 8532     | 6236     | 8561     | 38  |
| H(2B)  | 8638     | 6644     | 8117     | 38  |
| H(7A)  | 8015     | 8328     | 9236     | 197 |
| H(7B)  | 7718     | 8726     | 8741     | 197 |
| H(7C)  | 9079     | 8488     | 8865     | 197 |
| H(8)   | 8072     | 7845     | 8266     | 95  |
| H(9A)  | 9576     | 7267     | 8655     | 88  |
| H(9B)  | 8666     | 7049     | 9076     | 88  |
| H(3A)  | 3635     | 3749     | 8480     | 41  |
| H(3B)  | 3749     | 4439     | 8631     | 41  |
| H(4A)  | 802      | 4551     | 7899     | 43  |
| H(4B)  | 972      | 3942     | 7618     | 43  |
| H(10A) | 1184     | 3817     | 9310     | 65  |
| H(10B) | 2627     | 3861     | 9395     | 65  |
| H(10C) | 2044     | 3263     | 9093     | 65  |
| H(11)  | 1782     | 4563     | 8763     | 71  |
| H(12A) | 388      | 3800     | 8468     | 70  |
| H(12B) | 1468     | 3342     | 8282     | 70  |
| H(3'A) | 802      | 4551     | 7899     | 43  |
| H(3'B) | 972      | 3942     | 7618     | 43  |
| H(4'A) | 3635     | 3749     | 8480     | 41  |

|        |       |      |       |     |
|--------|-------|------|-------|-----|
| H(4'B) | 3749  | 4439 | 8631  | 41  |
| H(10D) | 348   | 3413 | 8926  | 63  |
| H(10E) | -562  | 3643 | 8491  | 63  |
| H(10F) | 71    | 4173 | 8846  | 63  |
| H(11') | 1521  | 3348 | 8274  | 70  |
| H(12C) | 1782  | 4551 | 8786  | 71  |
| H(12D) | 2130  | 3844 | 9006  | 71  |
| H(5A)  | 8488  | 5547 | 6325  | 54  |
| H(5B)  | 8271  | 4837 | 6301  | 54  |
| H(6A)  | 6029  | 5218 | 5336  | 46  |
| H(6B)  | 5817  | 5917 | 5439  | 46  |
| H(13A) | 9523  | 5015 | 5098  | 143 |
| H(13B) | 9988  | 4779 | 5631  | 143 |
| H(13C) | 10054 | 5535 | 5487  | 143 |
| H(14)  | 7956  | 4816 | 5524  | 96  |
| H(15A) | 7788  | 6160 | 5502  | 92  |
| H(15B) | 7664  | 5694 | 5028  | 92  |
| H(5'A) | 6029  | 5218 | 5336  | 46  |
| H(5'B) | 5817  | 5917 | 5439  | 46  |
| H(6'A) | 8488  | 5547 | 6325  | 54  |
| H(6'B) | 8271  | 4837 | 6301  | 54  |
| H(13D) | 7760  | 5650 | 4654  | 123 |
| H(13E) | 8831  | 6051 | 4927  | 123 |
| H(13F) | 7522  | 6379 | 4840  | 123 |
| H(14') | 7726  | 6104 | 5603  | 92  |
| H(15C) | 9225  | 5348 | 5594  | 96  |
| H(15D) | 8218  | 4793 | 5490  | 96  |
| H(16A) | 1343  | 6487 | 9752  | 252 |
| H(16B) | 380   | 6869 | 10076 | 252 |
| H(16C) | 1439  | 6451 | 10339 | 252 |
| H(17)  | 2110  | 7477 | 10416 | 129 |
| H(18A) | 995   | 7687 | 9472  | 116 |
| H(18B) | 690   | 8039 | 9986  | 116 |
| H(7D)  | 3248  | 6811 | 9719  | 134 |
| H(7E)  | 3711  | 7031 | 10207 | 134 |
| H(8A)  | 2321  | 8629 | 9955  | 74  |
| H(8B)  | 2104  | 8565 | 9421  | 74  |

---

**Table S7.** Torsion angles [°] for platon\_sq.

---

|                         |            |
|-------------------------|------------|
| O(6)-W(3)-O(2)-W(2)     | 133.2(6)   |
| O(11)-W(3)-O(2)-W(2)    | -42.8(10)  |
| O(10)-W(3)-O(2)-W(2)    | -125.6(6)  |
| O(3)-W(3)-O(2)-W(2)     | 31.7(6)    |
| O(33)-W(3)-O(2)-W(2)    | -53.3(6)   |
| O(4)-W(1)-O(7)-W(4)     | 165.6(3)   |
| O(12)-W(1)-O(7)-W(4)    | 63.9(3)    |
| O(1)-W(1)-O(7)-W(4)     | -91.6(3)   |
| O(3)-W(1)-O(7)-W(4)     | -21.9(7)   |
| O(31)-W(1)-O(7)-W(4)    | -6.9(2)    |
| O(5)-W(2)-O(8)-W(5)     | -168.0(3)  |
| O(9)-W(2)-O(8)-W(5)     | -65.4(3)   |
| O(1)-W(2)-O(8)-W(5)     | 89.7(3)    |
| O(2)-W(2)-O(8)-W(5)     | 19.9(7)    |
| O(32)-W(2)-O(8)-W(5)    | 5.6(2)     |
| O(5)-W(2)-O(9)-W(6)     | 166.7(3)   |
| O(8)-W(2)-O(9)-W(6)     | 63.7(3)    |
| O(1)-W(2)-O(9)-W(6)     | -27.1(7)   |
| O(2)-W(2)-O(9)-W(6)     | -91.6(3)   |
| O(32)-W(2)-O(9)-W(6)    | -7.6(2)    |
| O(4)-W(1)-O(12)-W(9)    | -168.2(3)  |
| O(7)-W(1)-O(12)-W(9)    | -67.9(3)   |
| O(1)-W(1)-O(12)-W(9)    | 16.8(7)    |
| O(3)-W(1)-O(12)-W(9)    | 89.6(3)    |
| O(31)-W(1)-O(12)-W(9)   | 4.2(3)     |
| O(19)-W(4)-O(18)-W(9)   | 178.0(3)   |
| O(25)-W(4)-O(18)-W(9)   | -77.3(3)   |
| O(13)-W(4)-O(18)-W(9)   | 16.0(6)    |
| O(7)-W(4)-O(18)-W(9)    | 80.6(3)    |
| O(31)-W(4)-O(18)-W(9)   | 8.1(2)     |
| O(25)-W(4)-O(19)-Cu(7)  | -71.5(10)  |
| O(18)-W(4)-O(19)-Cu(7)  | 24.7(10)   |
| O(13)-W(4)-O(19)-Cu(7)  | -162.3(9)  |
| O(7)-W(4)-O(19)-Cu(7)   | 110.9(9)   |
| O(31)-W(4)-O(19)-Cu(7)  | 87.7(14)   |
| O(25)-W(4)-O(19)-Cu(7') | -167.1(14) |

|                          |           |
|--------------------------|-----------|
| O(18)-W(4)-O(19)-Cu(7')  | -70.9(14) |
| O(13)-W(4)-O(19)-Cu(7')  | 102.1(14) |
| O(7)-W(4)-O(19)-Cu(7')   | 15.3(14)  |
| O(31)-W(4)-O(19)-Cu(7')  | -8(2)     |
| O(25)-W(4)-O(19)-Na(1)   | -34.1(10) |
| O(18)-W(4)-O(19)-Na(1)   | 62.2(9)   |
| O(13)-W(4)-O(19)-Na(1)   | -124.9(9) |
| O(7)-W(4)-O(19)-Na(1)    | 148.4(9)  |
| O(31)-W(4)-O(19)-Na(1)   | 125.1(11) |
| O(26)-W(5)-O(20)-Cu(5)#2 | 147.6(3)  |
| O(13)-W(5)-O(20)-Cu(5)#2 | -113.4(3) |
| O(14)-W(5)-O(20)-Cu(5)#2 | 54.4(3)   |
| O(8)-W(5)-O(20)-Cu(5)#2  | -27.8(3)  |
| O(19)-W(4)-O(25)-Cu(4)   | -54.6(4)  |
| O(18)-W(4)-O(25)-Cu(4)   | -157.1(4) |
| O(13)-W(4)-O(25)-Cu(4)   | 45.9(4)   |
| O(7)-W(4)-O(25)-Cu(4)    | 119.0(5)  |
| O(31)-W(4)-O(25)-Cu(4)   | 129.2(4)  |
| O(19)-W(4)-O(25)-Cu(1)   | 145.0(3)  |
| O(18)-W(4)-O(25)-Cu(1)   | 42.6(3)   |
| O(13)-W(4)-O(25)-Cu(1)   | -114.5(3) |
| O(7)-W(4)-O(25)-Cu(1)    | -41.4(7)  |
| O(31)-W(4)-O(25)-Cu(1)   | -31.1(3)  |
| O(20)-W(5)-O(26)-Cu(3)   | -146.1(3) |
| O(13)-W(5)-O(26)-Cu(3)   | 112.0(4)  |
| O(14)-W(5)-O(26)-Cu(3)   | -45.8(4)  |
| O(8)-W(5)-O(26)-Cu(3)    | 22.4(7)   |
| O(32)-W(5)-O(26)-Cu(3)   | 28.3(3)   |
| O(21)-W(6)-O(27)-Cu(3)   | 150.4(4)  |
| O(14)-W(6)-O(27)-Cu(3)   | 47.0(4)   |
| O(15)-W(6)-O(27)-Cu(3)   | -108.7(4) |
| O(9)-W(6)-O(27)-Cu(3)    | -24.3(7)  |
| O(32)-W(6)-O(27)-Cu(3)   | -26.2(3)  |
| O(21)-W(6)-O(27)-Cu(6)   | -67.2(3)  |
| O(14)-W(6)-O(27)-Cu(6)   | -170.6(3) |
| O(15)-W(6)-O(27)-Cu(6)   | 33.7(3)   |
| O(9)-W(6)-O(27)-Cu(6)    | 118.1(4)  |
| O(32)-W(6)-O(27)-Cu(6)   | 116.2(2)  |

|                        |           |
|------------------------|-----------|
| O(22)-W(7)-O(28)-Cu(2) | -141.5(3) |
| O(15)-W(7)-O(28)-Cu(2) | 117.5(3)  |
| O(16)-W(7)-O(28)-Cu(2) | -38.5(3)  |
| O(10)-W(7)-O(28)-Cu(2) | 34.3(7)   |
| O(33)-W(7)-O(28)-Cu(2) | 34.9(3)   |
| O(22)-W(7)-O(28)-Cu(6) | 59.6(3)   |
| O(15)-W(7)-O(28)-Cu(6) | -41.3(3)  |
| O(16)-W(7)-O(28)-Cu(6) | 162.7(3)  |
| O(10)-W(7)-O(28)-Cu(6) | -124.5(5) |
| O(33)-W(7)-O(28)-Cu(6) | -124.0(3) |
| O(23)-W(8)-O(29)-Cu(2) | 142.8(3)  |
| O(16)-W(8)-O(29)-Cu(2) | 40.1(3)   |
| O(17)-W(8)-O(29)-Cu(2) | -116.2(3) |
| O(11)-W(8)-O(29)-Cu(2) | -31.7(7)  |
| O(33)-W(8)-O(29)-Cu(2) | -33.9(3)  |
| O(23)-W(8)-O(29)-Cu(5) | -58.6(3)  |
| O(16)-W(8)-O(29)-Cu(5) | -161.2(3) |
| O(17)-W(8)-O(29)-Cu(5) | 42.4(3)   |
| O(11)-W(8)-O(29)-Cu(5) | 126.9(5)  |
| O(33)-W(8)-O(29)-Cu(5) | 124.7(3)  |
| O(24)-W(9)-O(30)-Cu(1) | -150.1(4) |
| O(17)-W(9)-O(30)-Cu(1) | 109.4(4)  |
| O(18)-W(9)-O(30)-Cu(1) | -48.3(4)  |
| O(12)-W(9)-O(30)-Cu(1) | 22.8(8)   |
| O(31)-W(9)-O(30)-Cu(1) | 25.2(4)   |
| O(24)-W(9)-O(30)-Cu(5) | 65.9(3)   |
| O(17)-W(9)-O(30)-Cu(5) | -34.7(3)  |
| O(18)-W(9)-O(30)-Cu(5) | 167.6(2)  |
| O(12)-W(9)-O(30)-Cu(5) | -121.3(4) |
| O(31)-W(9)-O(30)-Cu(5) | -118.9(2) |
| O(34)-P(1)-O(31)-W(9)  | -56.3(3)  |
| O(33)-P(1)-O(31)-W(9)  | 64.3(3)   |
| O(32)-P(1)-O(31)-W(9)  | -178.1(2) |
| O(34)-P(1)-O(31)-W(4)  | 58.5(3)   |
| O(33)-P(1)-O(31)-W(4)  | 179.1(2)  |
| O(32)-P(1)-O(31)-W(4)  | -63.3(3)  |
| O(34)-P(1)-O(31)-W(1)  | -177.9(2) |
| O(33)-P(1)-O(31)-W(1)  | -57.3(3)  |

|                        |           |
|------------------------|-----------|
| O(32)-P(1)-O(31)-W(1)  | 60.3(3)   |
| O(34)-P(1)-O(32)-W(5)  | -57.3(3)  |
| O(33)-P(1)-O(32)-W(5)  | -179.0(2) |
| O(31)-P(1)-O(32)-W(5)  | 63.2(3)   |
| O(34)-P(1)-O(32)-W(6)  | 61.0(3)   |
| O(33)-P(1)-O(32)-W(6)  | -60.8(3)  |
| O(31)-P(1)-O(32)-W(6)  | -178.5(2) |
| O(34)-P(1)-O(32)-W(2)  | -178.3(2) |
| O(33)-P(1)-O(32)-W(2)  | 59.9(3)   |
| O(31)-P(1)-O(32)-W(2)  | -57.9(3)  |
| O(34)-P(1)-O(33)-W(8)  | 56.5(3)   |
| O(31)-P(1)-O(33)-W(8)  | -63.7(3)  |
| O(32)-P(1)-O(33)-W(8)  | 179.1(2)  |
| O(34)-P(1)-O(33)-W(7)  | -62.3(3)  |
| O(31)-P(1)-O(33)-W(7)  | 177.5(2)  |
| O(32)-P(1)-O(33)-W(7)  | 60.4(3)   |
| O(34)-P(1)-O(33)-W(3)  | 177.7(3)  |
| O(31)-P(1)-O(33)-W(3)  | 57.5(3)   |
| O(32)-P(1)-O(33)-W(3)  | -59.6(3)  |
| O(33)-P(1)-O(34)-Cu(1) | -118.9(3) |
| O(31)-P(1)-O(34)-Cu(1) | 0.8(4)    |
| O(32)-P(1)-O(34)-Cu(1) | 120.3(3)  |
| O(33)-P(1)-O(34)-Cu(3) | 116.5(3)  |
| O(31)-P(1)-O(34)-Cu(3) | -123.8(3) |
| O(32)-P(1)-O(34)-Cu(3) | -4.3(3)   |
| O(33)-P(1)-O(34)-Cu(2) | 5.7(3)    |
| O(31)-P(1)-O(34)-Cu(2) | 125.3(3)  |
| O(32)-P(1)-O(34)-Cu(2) | -115.2(3) |
| C(3')-C(1)-C(2)-C(3)   | 3(4)      |
| C(3')-C(1)-C(2)-C(6)   | -176(3)   |
| C(1)-C(2)-C(3)-C(4)    | 175(3)    |
| C(6)-C(2)-C(3)-C(4)    | -6(5)     |
| C(1)-C(2)-C(3)-C(1')   | 0(4)      |
| C(6)-C(2)-C(3)-C(1')   | 179(2)    |
| C(2)-C(3)-C(4)-C(5)    | -178(3)   |
| C(1')-C(3)-C(4)-C(5)   | -3(4)     |
| C(3)-C(4)-C(5)-C(5')   | 4(3)      |
| C(4)-C(3)-C(1')-C(2')  | -179(3)   |



|                            |            |
|----------------------------|------------|
| C(2)-C(3)-C(1')-C(2')      | -4(4)      |
| C(4)-C(3)-C(1')-C(4')      | 3(4)       |
| C(2)-C(3)-C(1')-C(4')      | 179(3)     |
| C(4')-C(1')-C(2')-C(3')    | -178(3)    |
| C(3)-C(1')-C(2')-C(3')     | 5(4)       |
| C(2)-C(1)-C(3')-C(2')      | -1(5)      |
| C(1')-C(2')-C(3')-C(1)     | -2(4)      |
| C(2')-C(1')-C(4')-C(5')    | 177(2)     |
| C(3)-C(1')-C(4')-C(5')     | -5(4)      |
| C(4)-C(5)-C(5')-C(4')      | -6(3)      |
| C(1')-C(4')-C(5')-C(5)     | 7(3)       |
| Cu(4)-O(39)-C(6)-O(38)     | 13.1(13)   |
| Cu(4)-O(39)-C(6)-C(2)      | -157.3(9)  |
| Cu(1)-O(38)-C(6)-O(39)     | -15.8(12)  |
| Cu(1)-O(38)-C(6)-C(2)      | 154.9(9)   |
| C(1)-C(2)-C(6)-O(39)       | -57(2)     |
| C(3)-C(2)-C(6)-O(39)       | 124(3)     |
| C(1)-C(2)-C(6)-O(38)       | 131(2)     |
| C(3)-C(2)-C(6)-O(38)       | -48(3)     |
| Cu(4)-N(1)-C(8)-C(9)       | -40.8(12)  |
| Cu(4)-N(1)-C(8)-C(7)       | -174.7(12) |
| Cu(4)-N(2)-C(9)-C(8)       | -36.3(13)  |
| C(7)-C(8)-C(9)-N(2)        | -179.6(14) |
| N(1)-C(8)-C(9)-N(2)        | 50.9(14)   |
| Cu(5)-N(3)-C(11)-C(12)     | 42.2(8)    |
| Cu(5)-N(3)-C(11)-C(10)     | 162.1(9)   |
| N(3)-C(11)-C(12)-N(4)      | -54.6(9)   |
| C(10)-C(11)-C(12)-N(4)     | 178.0(8)   |
| Cu(5)-N(4)-C(12)-C(11)     | 40.4(8)    |
| Cu(5)-N(3')-C(11')-C(12')  | 40.4(8)    |
| Cu(5)-N(3')-C(11')-C(10')  | 152.1(15)  |
| Cu(5)-N(4')-C(12')-C(11')  | 42.2(8)    |
| C(10')-C(11')-C(12')-N(4') | 173.8(12)  |
| N(3')-C(11')-C(12')-N(4')  | -54.6(9)   |
| Cu(6)-N(5)-C(14)-C(13)     | -180(2)    |
| Cu(6)-N(5)-C(14)-C(15)     | 35.4(13)   |
| Cu(6)-N(6)-C(15)-C(14)     | 44.2(12)   |
| C(13)-C(14)-C(15)-N(6)     | 159.9(16)  |

|                            |            |
|----------------------------|------------|
| N(5)-C(14)-C(15)-N(6)      | -52.7(15)  |
| Cu(6)-N(5')-C(14')-C(13')  | -171.1(16) |
| Cu(6)-N(5')-C(14')-C(15')  | 44.2(12)   |
| N(5')-C(14')-C(15')-N(6')  | -52.7(15)  |
| C(13')-C(14')-C(15')-N(6') | 159.6(16)  |
| Cu(6)-N(6')-C(15')-C(14')  | 35.4(13)   |
| N(7)-C(17)-C(18)-N(8)      | -40(3)     |
| C(16)-C(17)-C(18)-N(8)     | -166(3)    |
| C(18)-C(17)-N(7)-Cu(7)     | 27(3)      |
| C(16)-C(17)-N(7)-Cu(7)     | 152(2)     |
| C(17)-C(18)-N(8)-Cu(7)     | 31(2)      |

---

Symmetry transformations used to generate equivalent atoms:

#1  $-x+1, y-1/2, -z+3/2$     #2  $-x+1, y+1/2, -z+3/2$

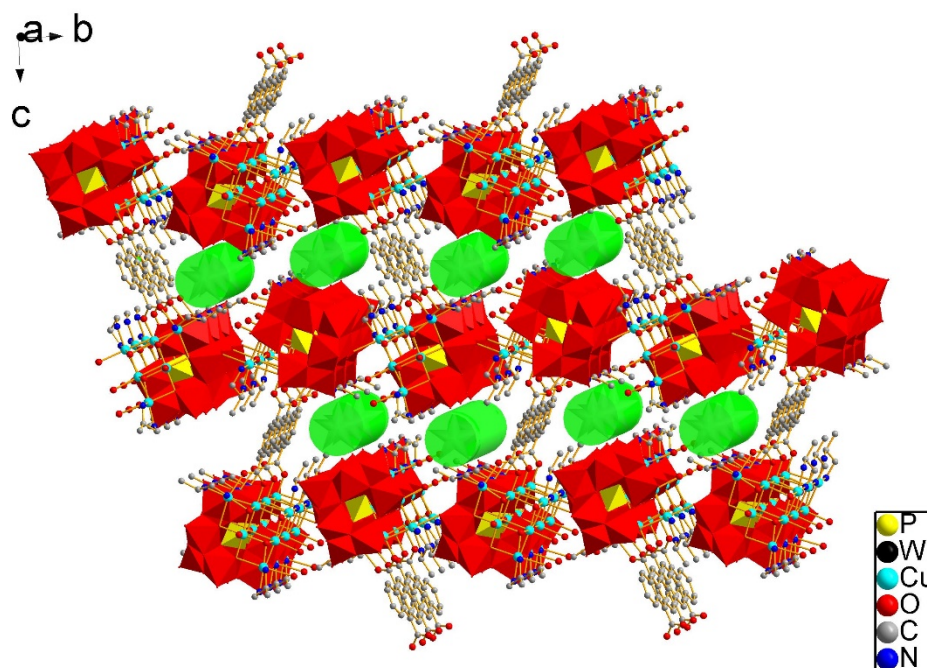

**Fig. S1.** View of stacking fashion of Cu-POMCOF in *bc* plane, the counter cations are omitted for clarify.

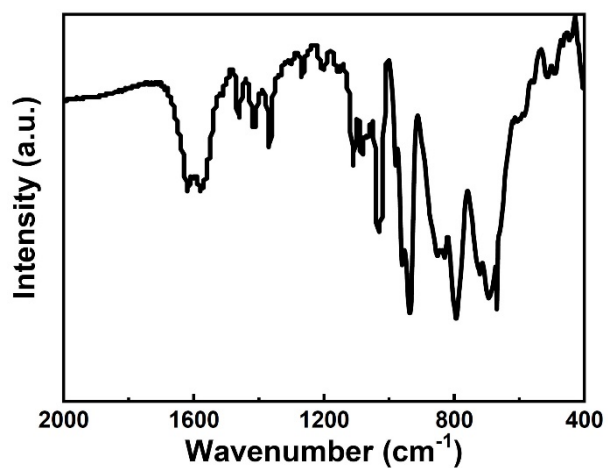

**Fig. S2.** IR spectra of Cu-POMCOF: 3436 (m), 3323 (m), 3256 (m), 2967(w), 2879(w), 2357 (w), 2338 (w), 1620 (m), 1563 (m), 1465 (w), 1369 (m), 1269 (w), 1105 (w), 1030 (s), 959 (m), 945 (s), 854 (m), 795 (s), 720 (m), 691 (s), 670 (s).

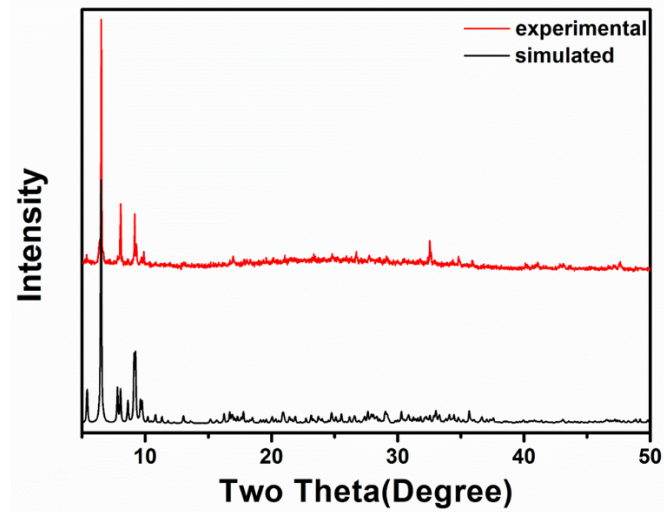

**Fig. S3.** The simulated and experimental PXRD patterns of Cu-POMCOF.

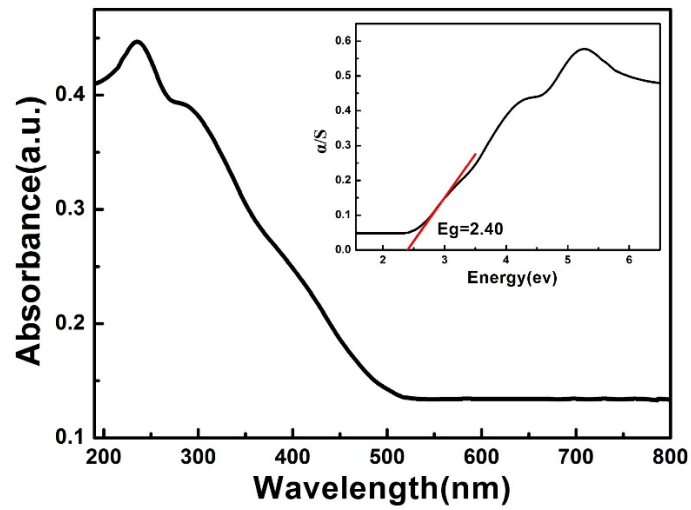

**Fig. S4.** UV/Vis-NIR diffuse reflectance spectrum of Cu-POMCOF.

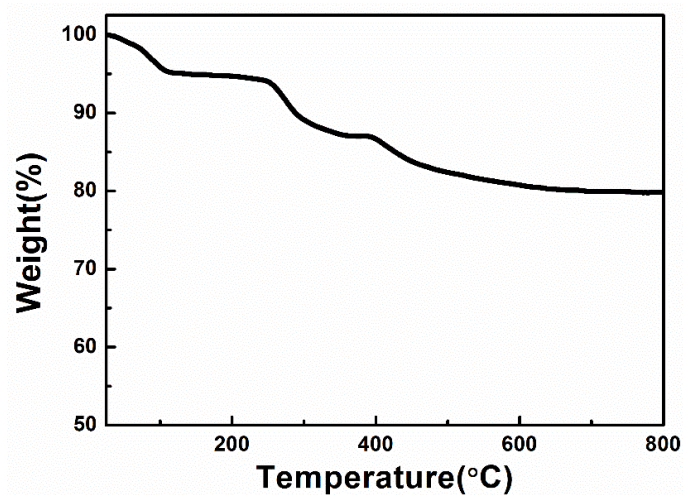

**Fig. S5.** The TG curves of Cu-POMCOF.

The thermogravimetric behaviors of **1** were investigated in the flowing air atmosphere from 25 to 1000 °C.

For Cu-POMCOF, the first weight loss of 5.18% from 25 to 170 °C is assigned to release of 2 lattice water molecules and [Na(dap)(H<sub>2</sub>O)<sub>2</sub>] (calcd. 4.99%). From 170 to 370 °C, the weight loss of 8.29% corresponds to release of 4 coordination water molecules and 3 dap groups (calcd. 8.13%).

### **Enzyme encapsulation**

Introducing 0.5 mg Cu-POMCOF to MP-11 solution (1 mg/mL) and Cyt C(1 mg/ml) solution separately, then incubating with gently shaken for 3 h at room temperature ( $25\pm 2$  °C). After that, mixture were centrifuged at 12000 g for 10 min and supernatant containing unloaded enzyme was carefully removed. The concentration of unloaded enzyme presented in supernatant was determined by UV-vis with an absorbance of 399 nm at different time. Then the concentration of loaded enzyme could be calculated by subtracting the amount of unloaded enzyme from initial enzyme solution. The precipitation contained immobilized enzyme was then washed 3 times with deionized water to remove unloaded enzyme and stored at 0 °C for further using.

### **Measurement of enzyme activity**

To measure the activity of immobilized enzyme and free enzyme, 5 mM MP-11 and MP-11@Cu-POMCOF contain equivalent amount of immobilized MP-11 was mixed with 2 mM ABTS, 10 mM H<sub>2</sub>O<sub>2</sub> in 300 μL of 0.1 M citric acid-sodium citrate buffer(pH=6). Then enzyme activities were obtained spectrophotometrically at 418 nm in a UV 3600 spectrophotometer (Shimadzu, Japan) at different time

When study enzyme specific activities in different buffer, citric acid-sodium citrate buffer was replaced by deionized water or organic buffer =1:1 with same ingredient and condition. The activity of Cyt c and Cyt c@Cu-POMCOF were using same method as described above.

### **Kinetic analysis**

In order to study the enzymatic kinetics parameters, the catalytic activity of different

group was measured with different of ABTS substrate concentrations ranging from 0.1-2.2 mM. Results were then fitting with Michaelis-Menten equation.

$$V=V_{\max} S/(K_m+S)$$

In this equation,  $V$  stands for reaction velocity( $\text{mmol}^{-1} \text{min}^{-1}$ ),  $S$  is the substrate concentration, and  $K_m$  is the Michealis-Menten constant, stands for the affinity between the enzyme and the substrate.  $K_m$  and  $V_{\max}$  could be obtained by fitting with nonlinear regression equation.

### **Enzyme recycling and leaking study**

For enzyme recycling, the reaction was conducted with same condition describe above. After the reaction was completed, the precipitation was collected by centrifugation at 1,2000g, the supernatant was collected for leaking experiment. Wash the pellet twice with deionized water and then used for next reaction, repeated for a total of five times. The enzyme activity testing method was the same as described previously. Meanwhile, by measuring enzyme concentration in supernatant after each cycle, we can learn how much enzyme was leaking from Cu-POMCOF.

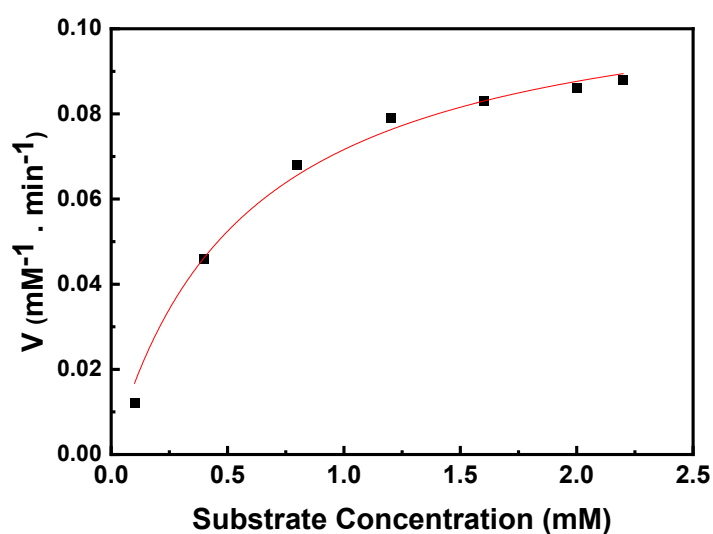

**Fig. S6.** The Michaelis-Menten plot for the effect of increasing concentration of ABTS on the velocity of free MP-11 in acid-sodium citrate buffer. The reactions were performed with 2 mM ABTS, 0.1-2.2 mM H<sub>2</sub>O<sub>2</sub>, 5 mM enzyme room temperature.

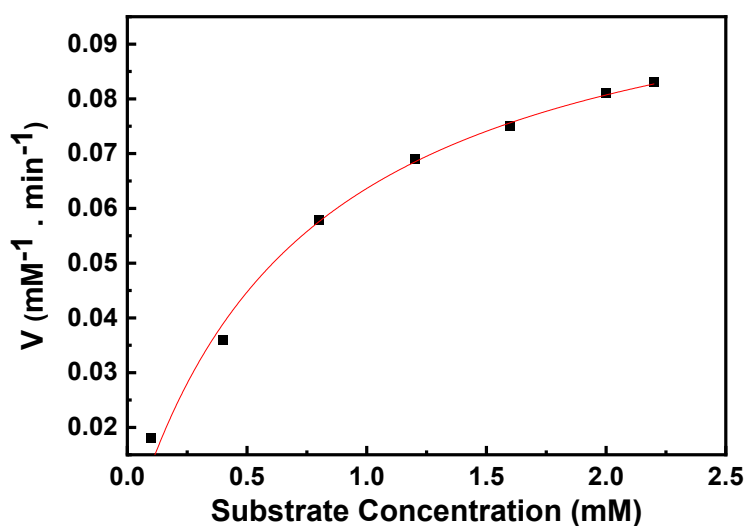

**Fig. S7.** The Michaelis-Menten plot for the effect of increasing concentration of ABTS on the velocity of free MP-11@Cu-POMCOF in acid-sodium citrate buffer. The reactions were performed with 2 mM ABTS, 0.1-2.2 mM H<sub>2</sub>O<sub>2</sub>, 5 mM enzyme room temperature.



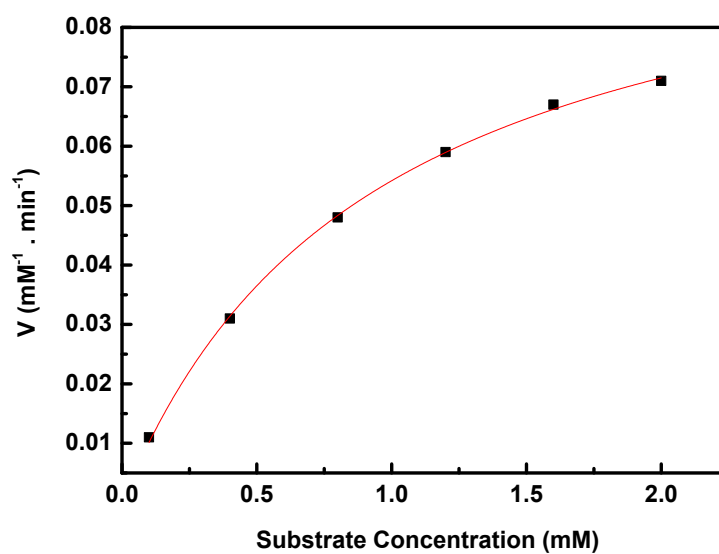

**Fig. S8.** The Michaelis-Menten plot for the effect of increasing concentration of ABTS on the velocity of free Cyt C in acid-sodium citrate buffer. The reactions were performed with 2 mM ABTS, 0.1-2.2 mM H<sub>2</sub>O<sub>2</sub>, 5 mM enzyme room temperature.

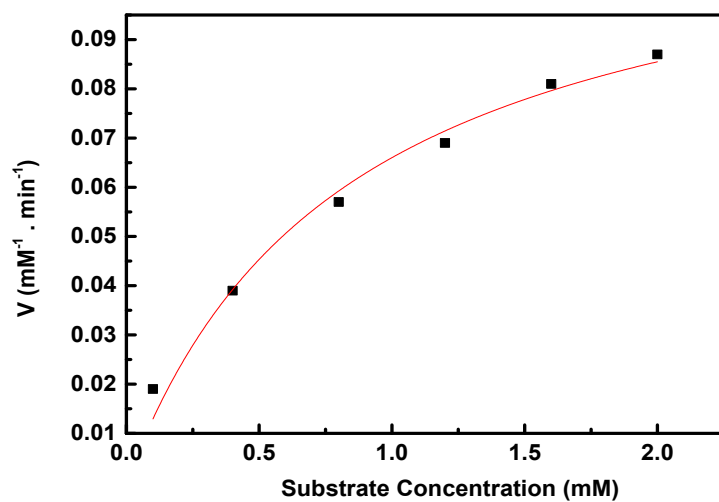

**Fig. S9.** The Michaelis-Menten plot for the effect of increasing concentration of ABTS on the velocity of free Cyt C@Cu-PMOF in acid-sodium citrate buffer. The reactions were performed with 2 mM ABTS, 0.1-2.0 mM H<sub>2</sub>O<sub>2</sub>, 5 mM enzyme room temperature.

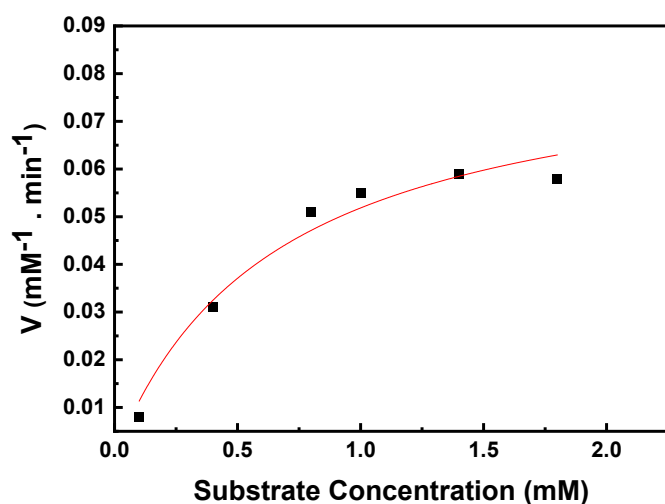

**Fig. S10.** The Michaelis-Menten plot for the effect of increasing concentration of ABTS on the velocity of free Cyt C in water. The reactions were performed with 2 mM ABTS, 0.1-2.2 mM H<sub>2</sub>O<sub>2</sub>, 5 mM enzyme room temperature.

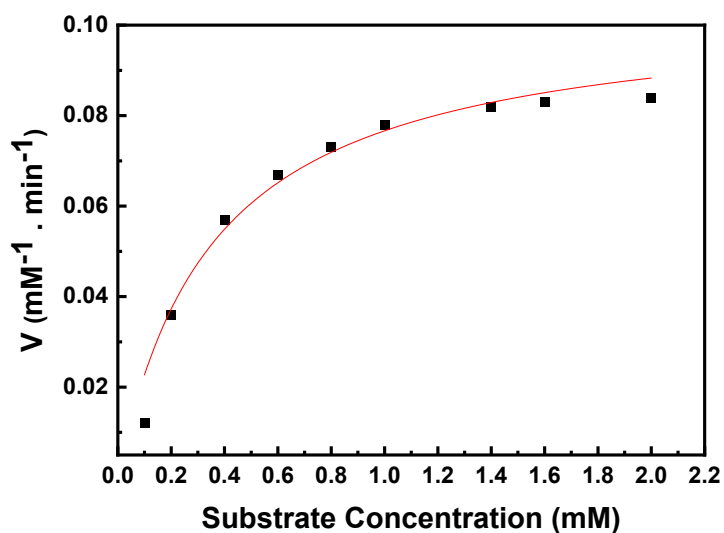

**Fig. S11.** The Michaelis-Menten plot for the effect of increasing concentration of ABTS on the velocity of free Cyt C@Cu-PMOF in water. The reactions were performed with 2 mM ABTS, 0.1-2.2 mM H<sub>2</sub>O<sub>2</sub>, 5 mM enzyme room temperature.

**Table S8.** Kinetic parameters of enzymes and enzyme@Cu-POMCOFs in acid-sodium citrate buffer.

|                 | $K_m$ | $V_{max}$ | $V_{max}/K_m$ |
|-----------------|-------|-----------|---------------|
| Free MP-11      | 0.57  | 0.11      | 0.19          |
| MP-11@Cu-POMCOF | 0.73  | 0.12      | 0.16          |
| Free Cyt c      | 0.83  | 0.089     | 0.10          |
| Cyt c@Cu-POMCOF | 0.93  | 0.097     | 0.11          |

**Table S9.** Kinetic parameters of MP-11 and MP-11@Cu-POMCOF in water.

|                 | $K_m$ | $V_{max}$ | $V_{max}/K_m$ |
|-----------------|-------|-----------|---------------|
| Free MP-11      | 1.92  | 0.06      | 0.031         |
| MP-11@Cu-POMCOF | 1.43  | 0.14      | 0.097         |

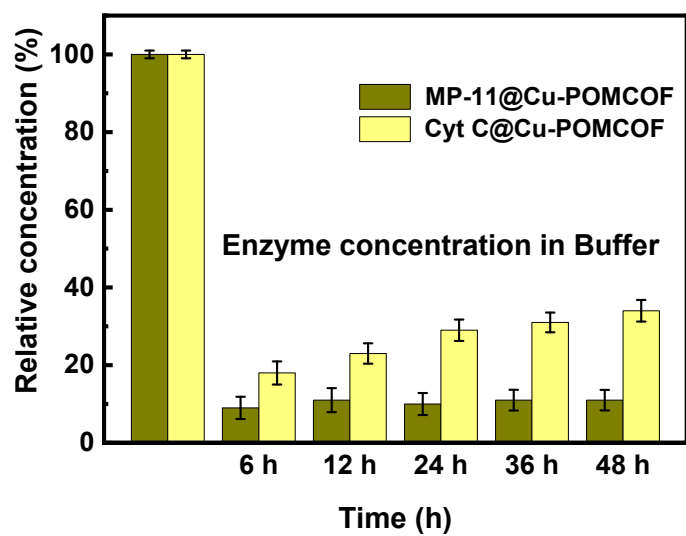

**Fig. S12.** the recyclability of immobilized enzymes by a simple centrifugation process.

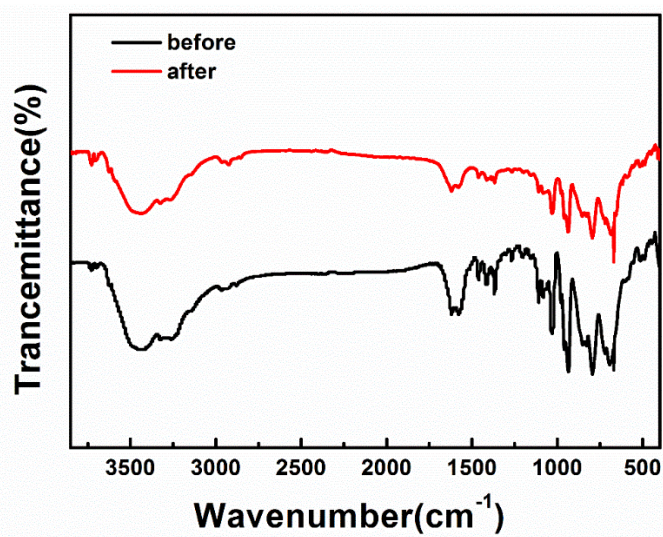

**Fig. S13.** IR spectra of Cu-POMCOF before and after enzyme encapsulate.
